# Supplementary material for: Catalyst-free multicomponent polymerization of aldehydes, amines and trimethylsilyl cyanide toward poly(α-aminonitrile)s
Source: Royal Society of Chemistry journal article supplement (doi:10.1039/d4py00255e), 2024-01-01

## Supporting Information

# Catalyst-Free Multicomponent Polymerization of Aldehyde, Amine and Trimethylsilyl Cyanide toward Poly( $\alpha$ -aminonitrile)s

Tianyu Cheng,<sup>\*,1</sup> Huadong Wang,<sup>1</sup> Jianqing Ding,<sup>1</sup> Junguo Fang,<sup>1</sup> Jia Wang,<sup>\*,2</sup>

Mingzhao Li,<sup>3</sup> Jie Chen,<sup>3</sup> Anjun Qin<sup>\*,3</sup>, Ben Zhong Tang<sup>4</sup>

<sup>1</sup>School of Chemical and Environmental Engineering, Anhui Polytechnic University,

Wuhu 241000, China. E-mail: [chengty@ahpu.edu.cn](mailto:chengty@ahpu.edu.cn)

<sup>2</sup>Songshan Lake Materials Laboratory, Dongguan 523808, China. E-mail:

[wangjia@sslslab.org.cn](mailto:wangjia@sslslab.org.cn)

<sup>3</sup>State Key Laboratory of Luminescent Materials and Devices, Guangdong Provincial

Key Laboratory of Luminescence from Molecular Aggregates, AIE Institute, Center

for Aggregation-Induced Emission, South China University of Technology,

Guangzhou 510640, China. Email: [msqinaj@scut.edu.cn](mailto:msqinaj@scut.edu.cn)

<sup>4</sup>School of Science and Engineering, Shenzhen Institute of Aggregate Science and

Technology, The Chinese University of Hong Kong, Shenzhen (CUHK-Shenzhen),

Guangdong, 518172, P.R. China

# Contents

|                                                                                                                                                                          |     |
|--------------------------------------------------------------------------------------------------------------------------------------------------------------------------|-----|
| <b>Figure S1.</b> The GPC traces of <b>P1a/2a/3-P1c/2d/3</b> .                                                                                                           | S4  |
| <b>Figure S2.</b> $^1\text{H}$ NMR spectra of (A) model compound and (B) model compound treated with $\text{D}_2\text{O}$                                                | S4  |
| <b>Figure S3.</b> FT-IR spectra of (A) <b>1a</b> , (B) <b>2b</b> and (C) <b>P1a/2b/3</b> .                                                                               | S5  |
| <b>Figure S4.</b> FT-IR spectra of (A) <b>1a</b> , (B) <b>2c</b> and (C) <b>P1a/2c/3</b> .                                                                               | S6  |
| <b>Figure S5.</b> FT-IR spectra of (A) <b>1a</b> , (B) <b>2d</b> and (C) <b>P1a/2d/3</b> .                                                                               | S7  |
| <b>Figure S6.</b> FT-IR spectra of (A) <b>1b</b> , (B) <b>2a</b> and (C) <b>P1b/2a/3</b> .                                                                               | S8  |
| <b>Figure S7.</b> FT-IR spectra of (A) <b>1b</b> , (B) <b>2b</b> and (C) <b>P1b/2b/3</b> .                                                                               | S9  |
| <b>Figure S8.</b> FT-IR spectra of (A) <b>1b</b> , (B) <b>2c</b> and (C) <b>P1b/2c/3</b> .                                                                               | S10 |
| <b>Figure S9.</b> FT-IR spectra of (A) <b>1b</b> , (B) <b>2d</b> and (C) <b>P1b/2d/3</b> .                                                                               | S11 |
| <b>Figure S10.</b> FT-IR spectra of (A) <b>1c</b> , (B) <b>2a</b> and (C) <b>P1c/2a/3</b> .                                                                              | S12 |
| <b>Figure S11.</b> FT-IR spectra of (A) <b>1c</b> , (B) <b>2b</b> and (C) <b>P1c/2b/3</b> .                                                                              | S13 |
| <b>Figure S12.</b> FT-IR spectra of (A) <b>1c</b> , (B) <b>2c</b> and (C) <b>P1c/2c/3</b> .                                                                              | S14 |
| <b>Figure S13.</b> FT-IR spectra of (A) <b>1c</b> , (B) <b>2d</b> and (C) <b>P1c/2d/3</b> .                                                                              | S15 |
| <b>Figure S14.</b> $^1\text{H}$ NMR spectra of (A) <b>1a</b> , (B) <b>2b</b> and (C) <b>P1a/2b/3</b> in $\text{DMSO-}d_6$ . The solvent peaks are marked with asterisks. | S16 |
| <b>Figure S15.</b> $^1\text{H}$ NMR spectra of (A) <b>1a</b> , (B) <b>2c</b> and (C) <b>P1a/2c/3</b> in $\text{DMSO-}d_6$ . The solvent peaks are marked with asterisks. | S17 |
| <b>Figure S16.</b> $^1\text{H}$ NMR spectra of (A) <b>1a</b> , (B) <b>2d</b> and (C) <b>P1a/2d/3</b> in $\text{DMSO-}d_6$ . The solvent peaks are marked with asterisks. | S18 |
| <b>Figure S17.</b> $^1\text{H}$ NMR spectra of (A) <b>1b</b> , (B) <b>2a</b> and (C) <b>P1b/2a/3</b> in $\text{DMSO-}d_6$ . The solvent peaks are marked with asterisks. | S19 |
| <b>Figure S18.</b> $^1\text{H}$ NMR spectra of (A) <b>1b</b> , (B) <b>2b</b> and (C) <b>P1b/2b/3</b> in $\text{DMSO-}d_6$ . The solvent peaks are marked with asterisks. | S20 |
| <b>Figure S19.</b> $^1\text{H}$ NMR spectra of (A) <b>1b</b> , (B) <b>2c</b> and (C) <b>P1b/2c/3</b> in $\text{DMSO-}d_6$ . The solvent peaks are marked with asterisks. | S21 |
| <b>Figure S20.</b> $^1\text{H}$ NMR spectra of (A) <b>1b</b> , (B) <b>2d</b> and (C) <b>P1b/2d/3</b> in $\text{DMSO-}d_6$ . The solvent peaks are marked with asterisks. | S22 |
| <b>Figure S21.</b> $^1\text{H}$ NMR spectra of (A) <b>1c</b> , (B) <b>2a</b> and (C) <b>P1c/2a/3</b> in $\text{DMSO-}d_6$ . The solvent peaks are marked with asterisks. | S23 |
| <b>Figure S22.</b> $^1\text{H}$ NMR spectra of (A) <b>1c</b> , (B) <b>2b</b> and (C) <b>P1c/2b/3</b> in $\text{DMSO-}d_6$ . The solvent peaks are marked with asterisks. | S24 |
| <b>Figure S23.</b> $^1\text{H}$ NMR spectra of (A) <b>1c</b> , (B) <b>2c</b> and (C) <b>P1c/2c/3</b> in $\text{DMSO-}d_6$ . The solvent peaks are marked with asterisks. | S25 |
| <b>Figure S24.</b> $^1\text{H}$ NMR spectra of (A) <b>1c</b> , (B) <b>2d</b> and (C) <b>P1c/2d/3</b> in $\text{DMSO-}d_6$ . The                                          |     |

|                                                                                                                                                                                                |     |
|------------------------------------------------------------------------------------------------------------------------------------------------------------------------------------------------|-----|
| solvent peaks are marked with asterisks.                                                                                                                                                       | S26 |
| <b>Figure S25.</b> $^{13}\text{C}$ NMR spectra of (A) <b>1a</b> , (B) <b>2b</b> and (C) <b>P1a/2b/3</b> in $\text{DMSO-}d_6$ . The solvent peaks are marked with asterisks.                    | S27 |
| <b>Figure S26.</b> $^{13}\text{C}$ NMR spectra of (A) <b>1a</b> , (B) <b>2c</b> and (C) <b>P1a/2c/3</b> in $\text{DMSO-}d_6$ . The solvent peaks are marked with asterisks.                    | S28 |
| <b>Figure S27.</b> $^{13}\text{C}$ NMR spectra of (A) <b>1a</b> , (B) <b>2d</b> and (C) <b>P1a/2d/3</b> in $\text{DMSO-}d_6$ . The solvent peaks are marked with asterisks.                    | S29 |
| <b>Figure S28.</b> $^{13}\text{C}$ NMR spectra of (A) <b>1b</b> , (B) <b>2a</b> and (C) <b>P1b/2a/3</b> in $\text{DMSO-}d_6$ . The solvent peaks are marked with asterisks.                    | S30 |
| <b>Figure S29.</b> $^{13}\text{C}$ NMR spectra of (A) <b>1b</b> , (B) <b>2b</b> and (C) <b>P1b/2b/3</b> in $\text{DMSO-}d_6$ . The solvent peaks are marked with asterisks.                    | S31 |
| <b>Figure S30.</b> $^{13}\text{C}$ NMR spectra of (A) <b>1b</b> , (B) <b>2c</b> and (C) <b>P1b/2c/3</b> in $\text{DMSO-}d_6$ . The solvent peaks are marked with asterisks.                    | S32 |
| <b>Figure S31.</b> $^{13}\text{C}$ NMR spectra of (A) <b>1b</b> , (B) <b>2d</b> and (C) <b>P1b/2d/3</b> in $\text{DMSO-}d_6$ . The solvent peaks are marked with asterisks.                    | S33 |
| <b>Figure S32.</b> $^{13}\text{C}$ NMR spectra of (A) <b>1c</b> , (B) <b>2a</b> and (C) <b>P1c/2a/3</b> in $\text{DMSO-}d_6$ . The solvent peaks are marked with asterisks.                    | S34 |
| <b>Figure S33.</b> $^{13}\text{C}$ NMR spectra of (A) <b>1c</b> , (B) <b>2b</b> and (C) <b>P1c/2b/3</b> in $\text{DMSO-}d_6$ . The solvent peaks are marked with asterisks.                    | S35 |
| <b>Figure S34.</b> $^{13}\text{C}$ NMR spectra of (A) <b>1c</b> , (B) <b>2c</b> and (C) <b>P1c/2c/3</b> in $\text{DMSO-}d_6$ . The solvent peaks are marked with asterisks.                    | S36 |
| <b>Figure S35.</b> $^{13}\text{C}$ NMR spectra of (A) <b>1c</b> , (B) <b>2d</b> and (C) <b>P1c/2d/3</b> in $\text{DMSO-}d_6$ . The solvent peaks are marked with asterisks.                    | S37 |
| <b>Figure S36.</b> DSC curve of polymers.                                                                                                                                                      | S37 |
| <b>Table S1.</b> Refractive Indices, Abbé Numbers ( $\nu_D$ ), Revised Abbé Numbers ( $\nu'$ ), and Optical Dispersions ( $D$ and $D'$ ) of Thin Films of <b>P1a/2/3</b> .                     | S38 |
| <b>Figure S37.</b> $^{13}\text{C}$ NMR spectra of (A) <b>P1a/2a/3</b> and (B) postfunctionalized <b>P1a/2a/3</b> in $\text{DMSO-}d_6$ . The solvent and water peaks are marked with asterisks. | S38 |
| <b>Scheme S1.</b> The postmodification route of <b>P1a/2a/3</b> .                                                                                                                              | S38 |

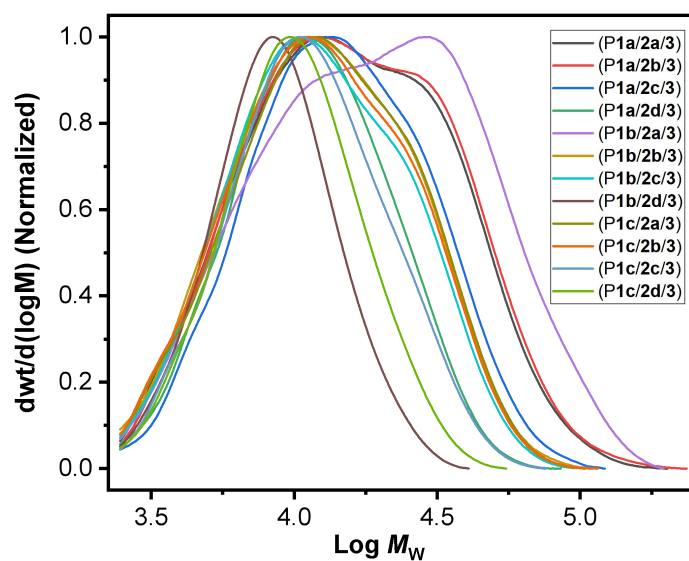

**Figure S1.** The GPC traces of P1a/2a/3-P1c/2d/3, estimated by gel-permeation chromatography (GPC) on the basis of a PMMA calibration and DMF containing 0.05 M LiBr as the eluent.

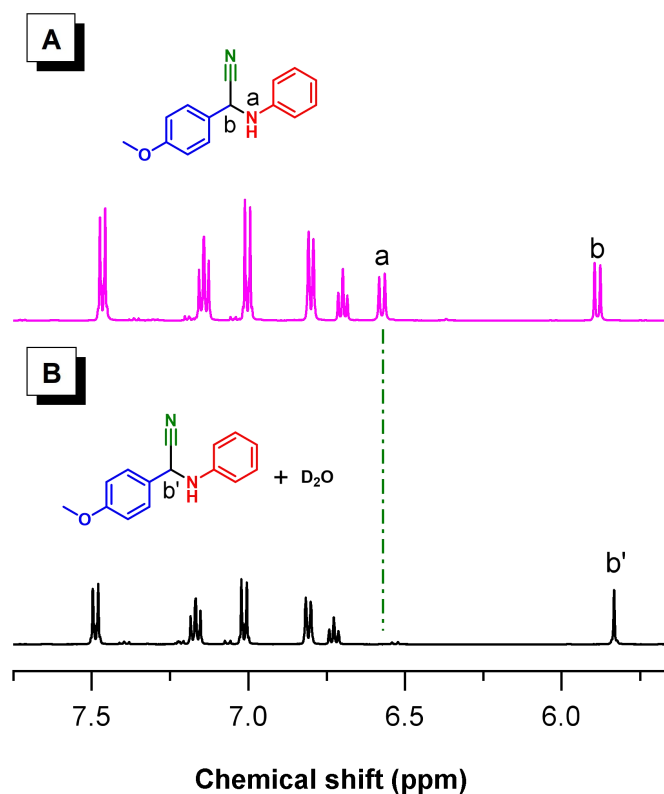

**Figure S2.**  $^1\text{H}$  NMR spectra of (A) model compound and (B) model compound treated with  $\text{D}_2\text{O}$

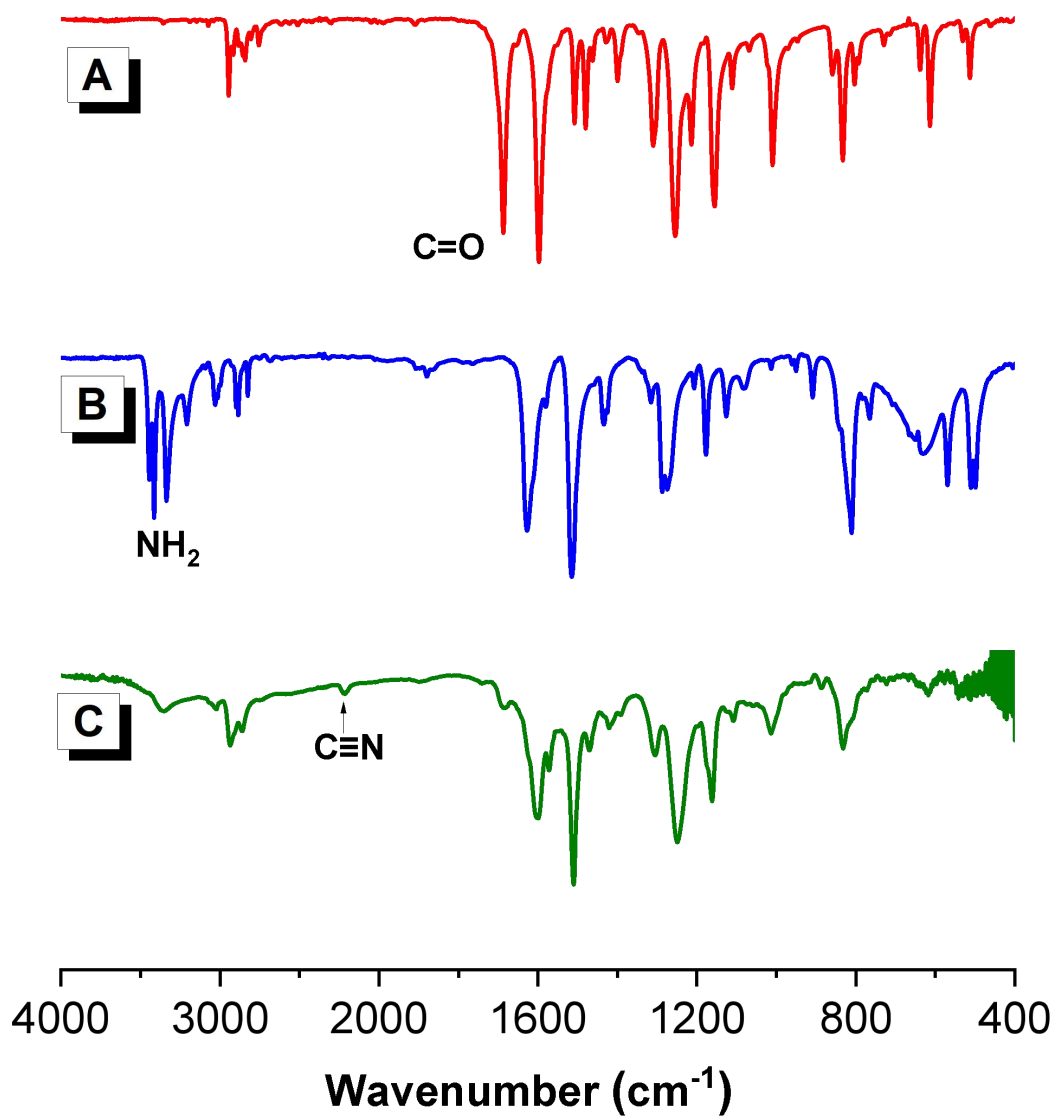

Figure S3. FT-IR spectra of (A) 1a, (B) 2b and (C) P1a/2b/3.

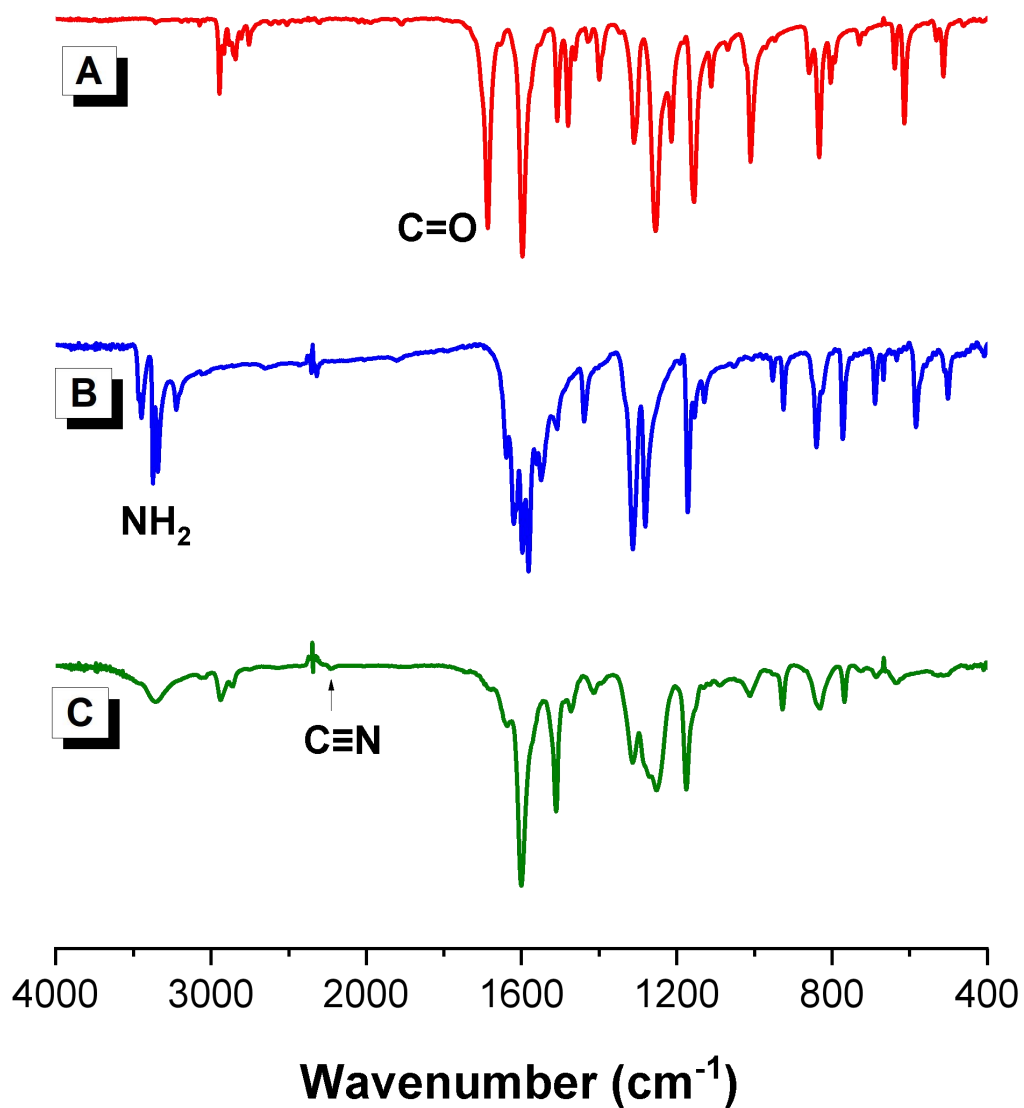

Figure S4. FT-IR spectra of (A) 1a, (B) 2c and (C) P1a/2c/3.

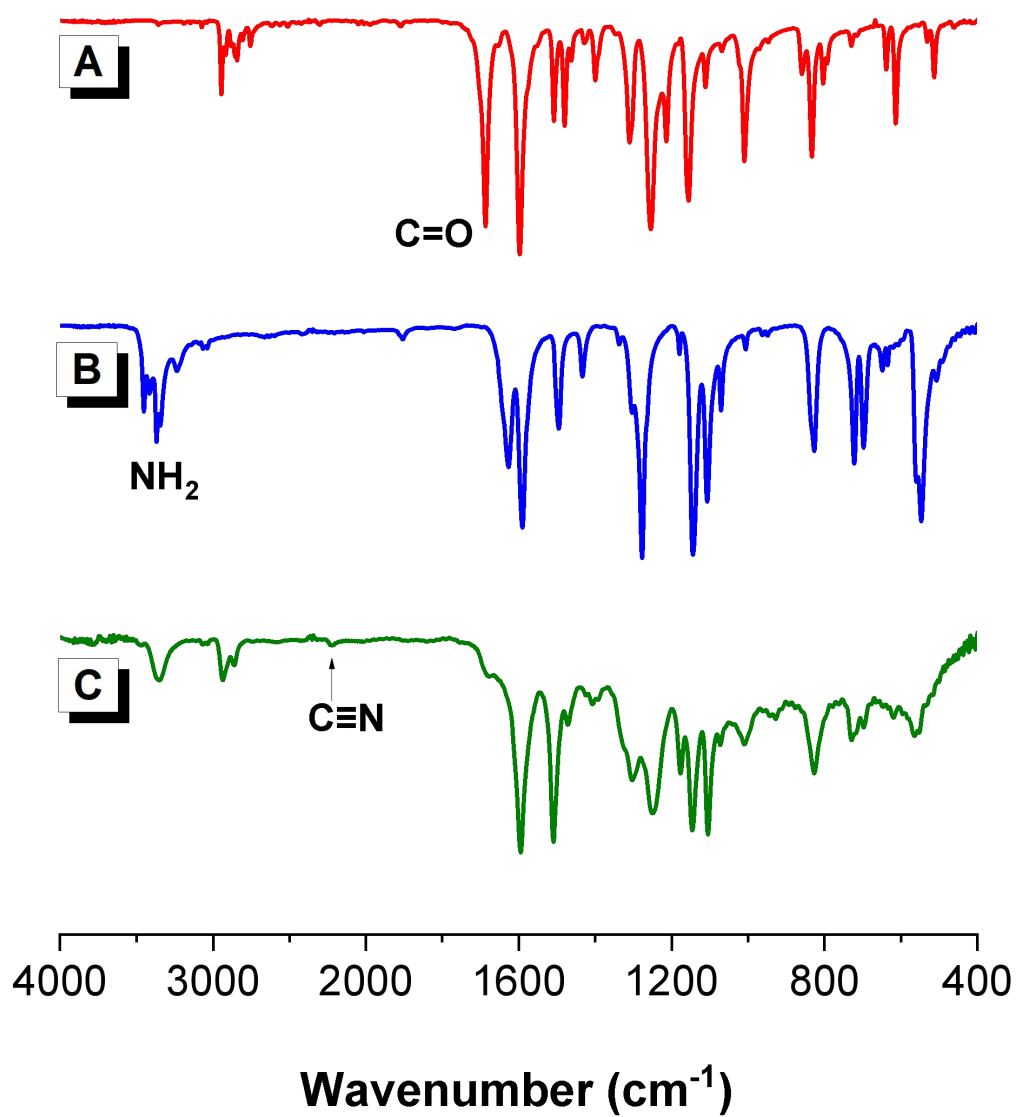

Figure S5. FT-IR spectra of (A) 1a, (B) 2d and (C) P1a/2d/3.

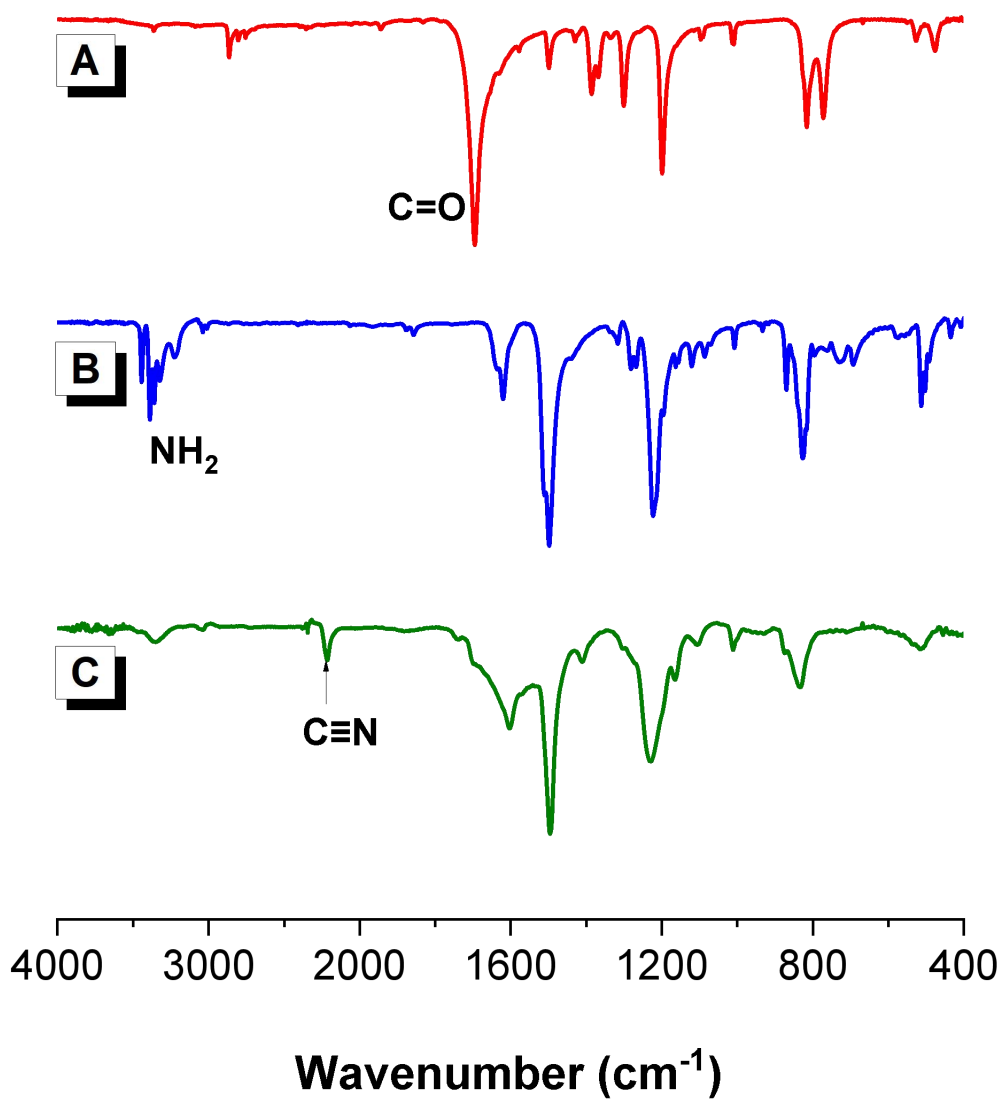

Figure S6. FT-IR spectra of (A) **1b**, (B) **2a** and (C) **P1b/2a/3**.



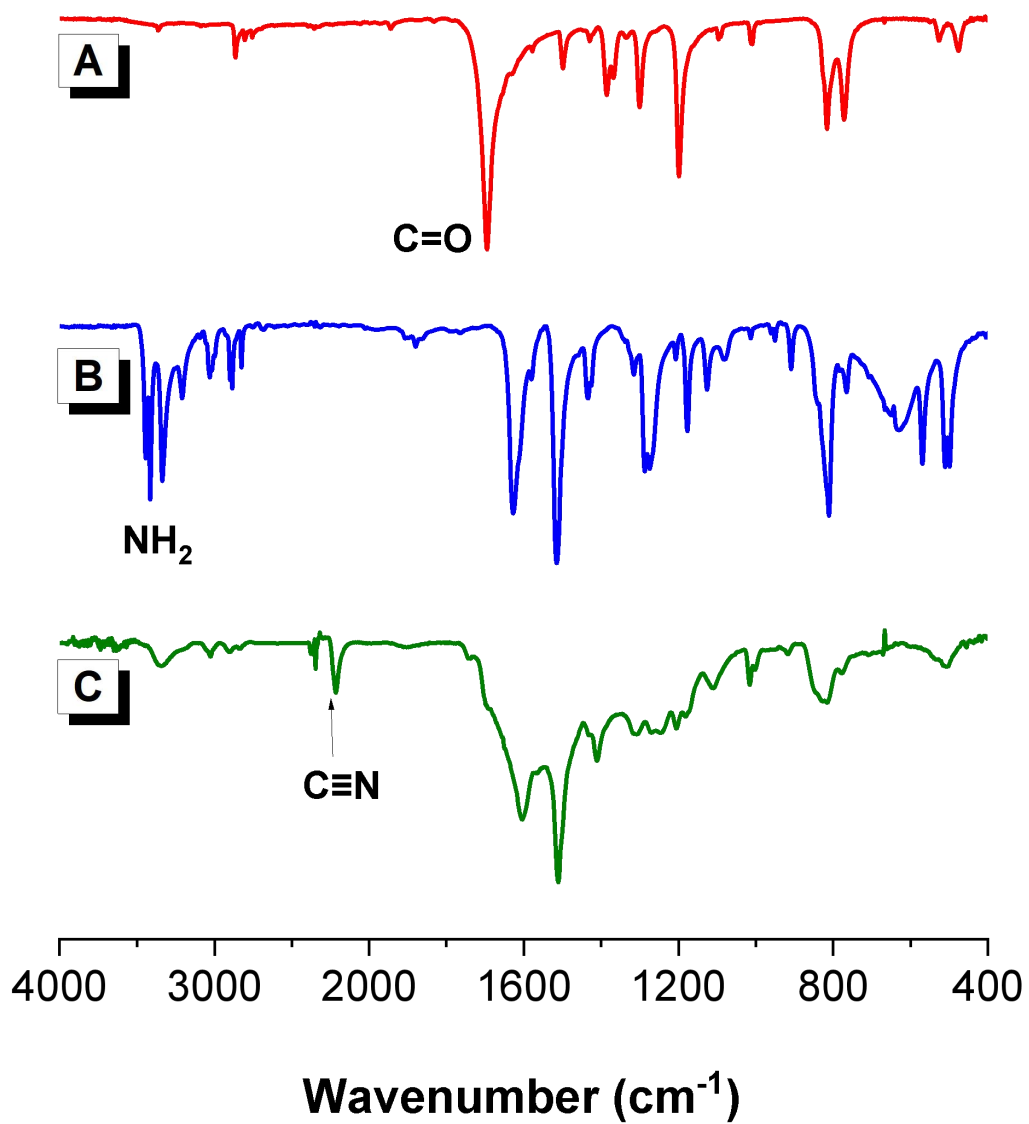

Figure S7. FT-IR spectra of (A) **1b**, (B) **2b** and (C) P**1b/2b/3**.

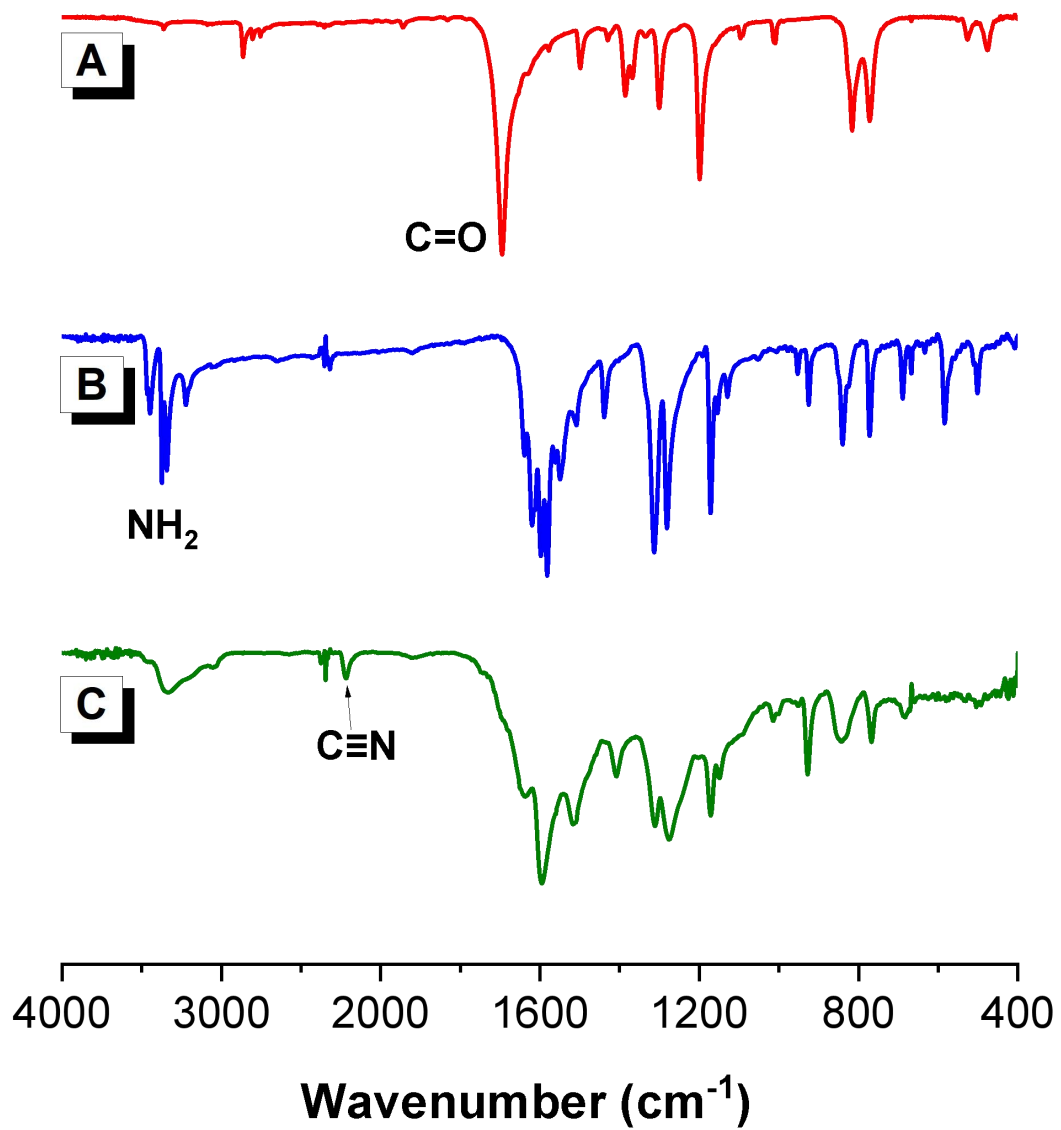

Figure S8. FT-IR spectra of (A) **1b**, (B) **2c** and (C) **P1b/2c/3**.

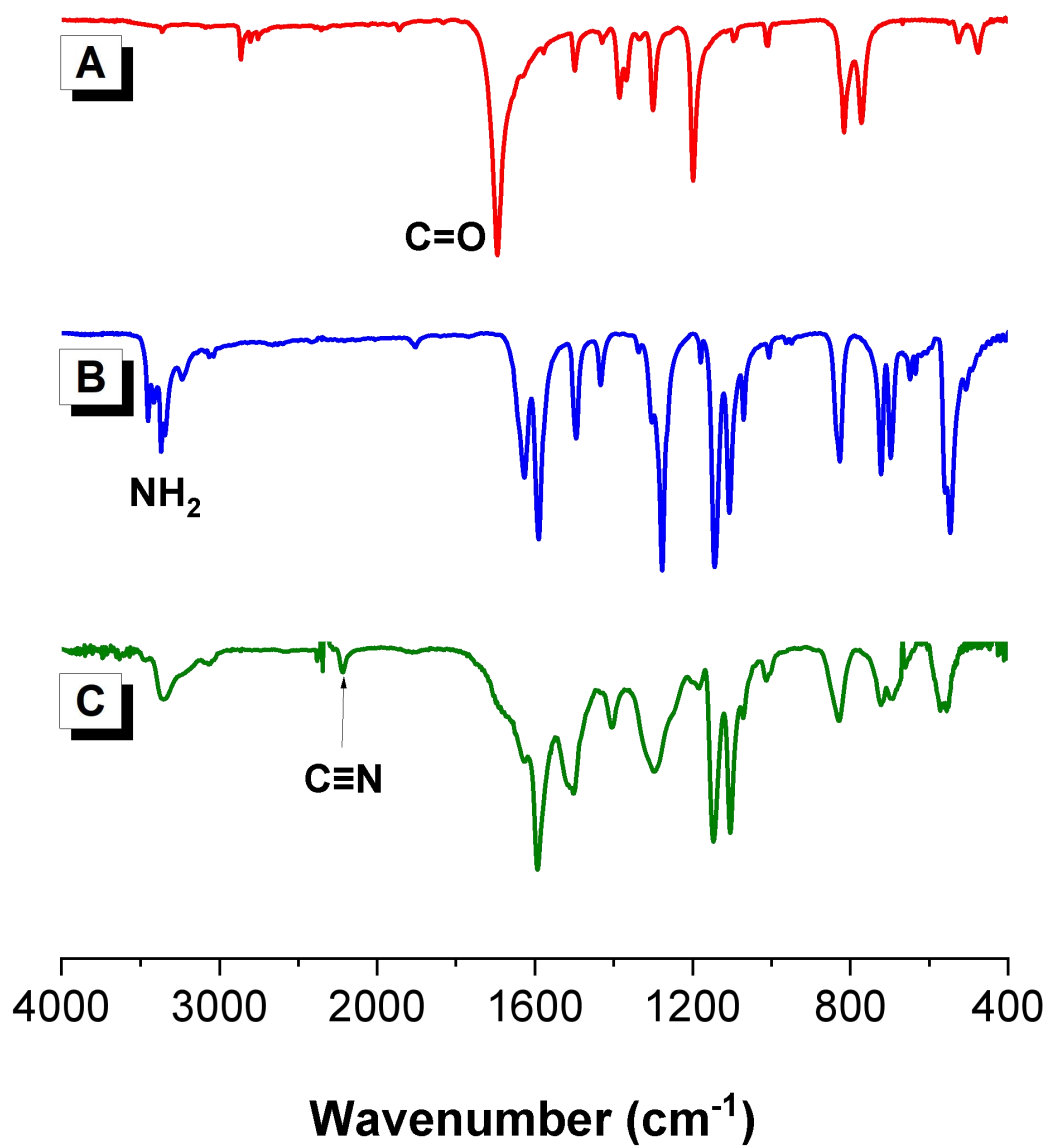

Figure S9. FT-IR spectra of (A) **1b**, (B) **2d** and (C) **P1b/2d/3**.

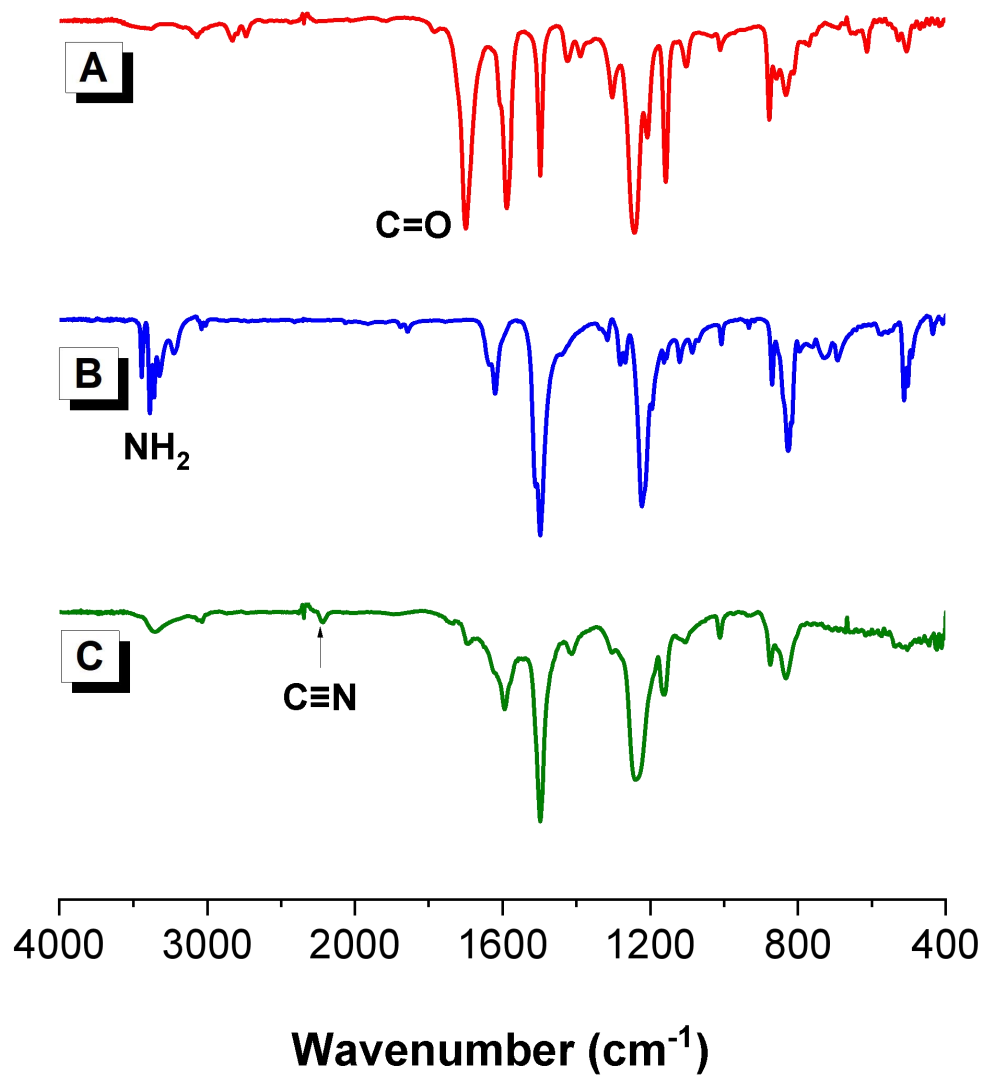

Figure S10. FT-IR spectra of (A) **1c**, (B) **2a** and (C) **P1c/2a/3**.

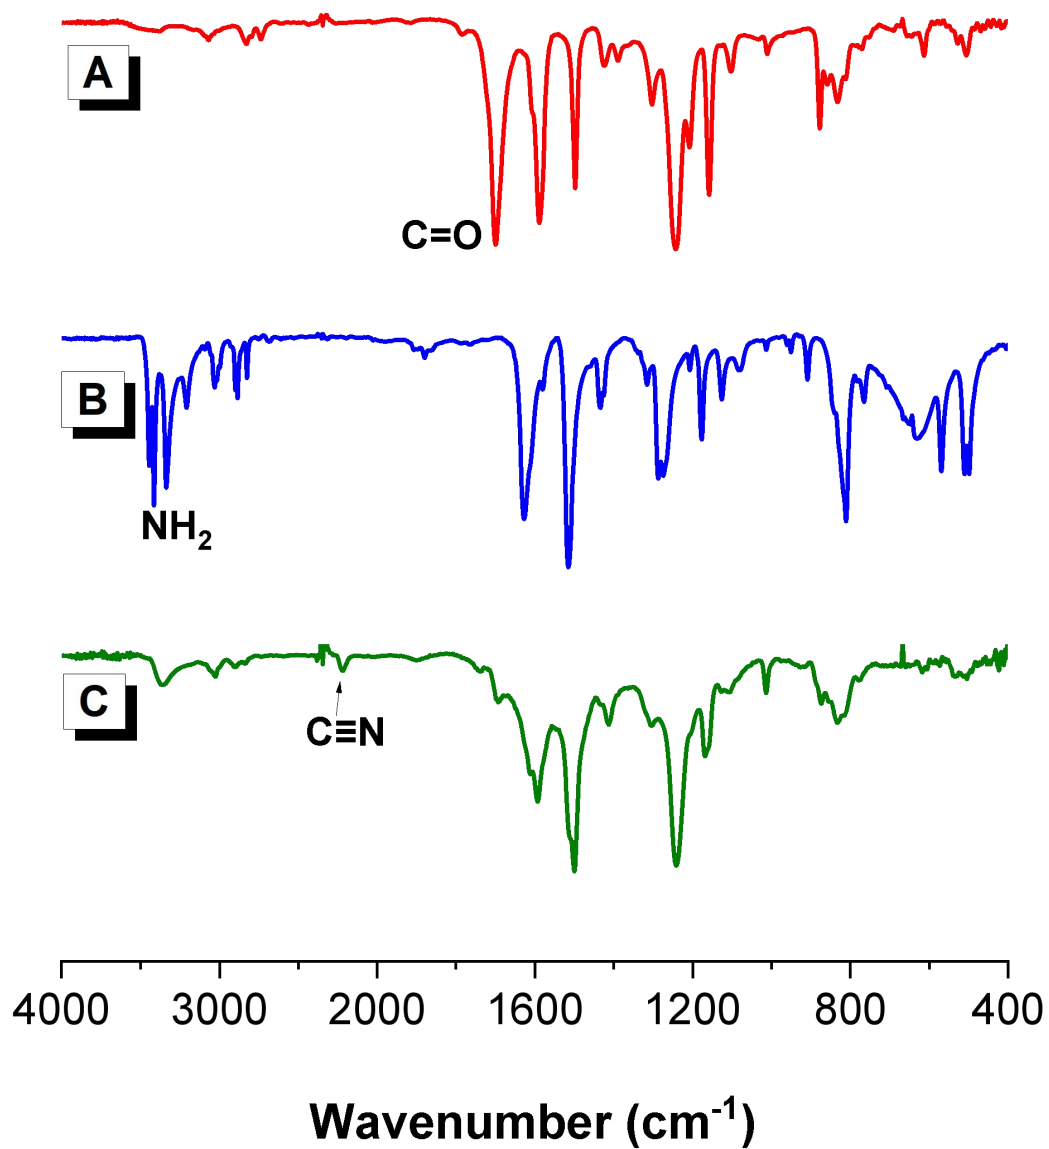

Figure S11. FT-IR spectra of (A) **1c**, (B) **2b** and (C) **P1c/2b/3**.

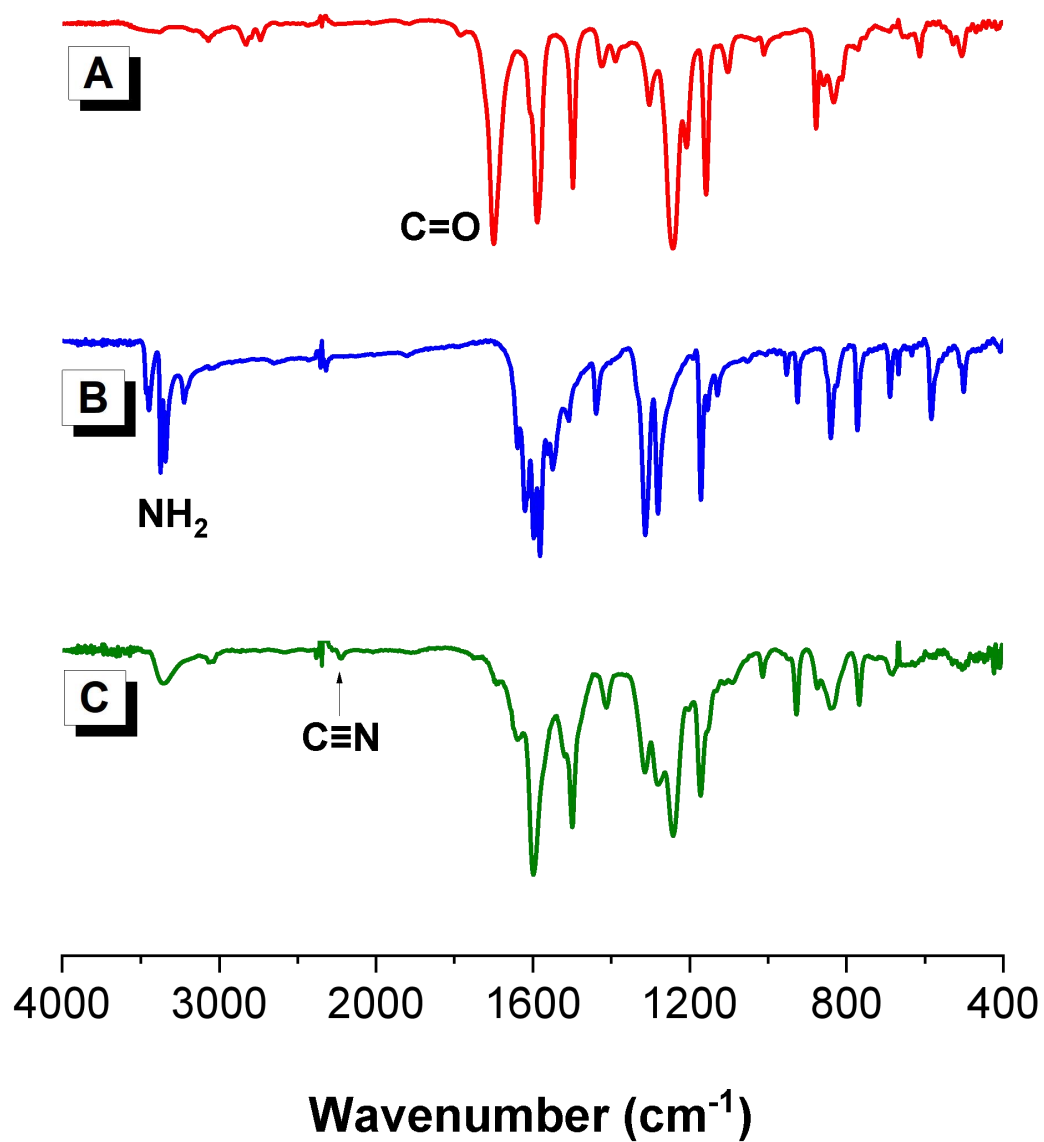

Figure S12. FT-IR spectra of (A) 1c, (B) 2c and (C) P1c/2c/3.

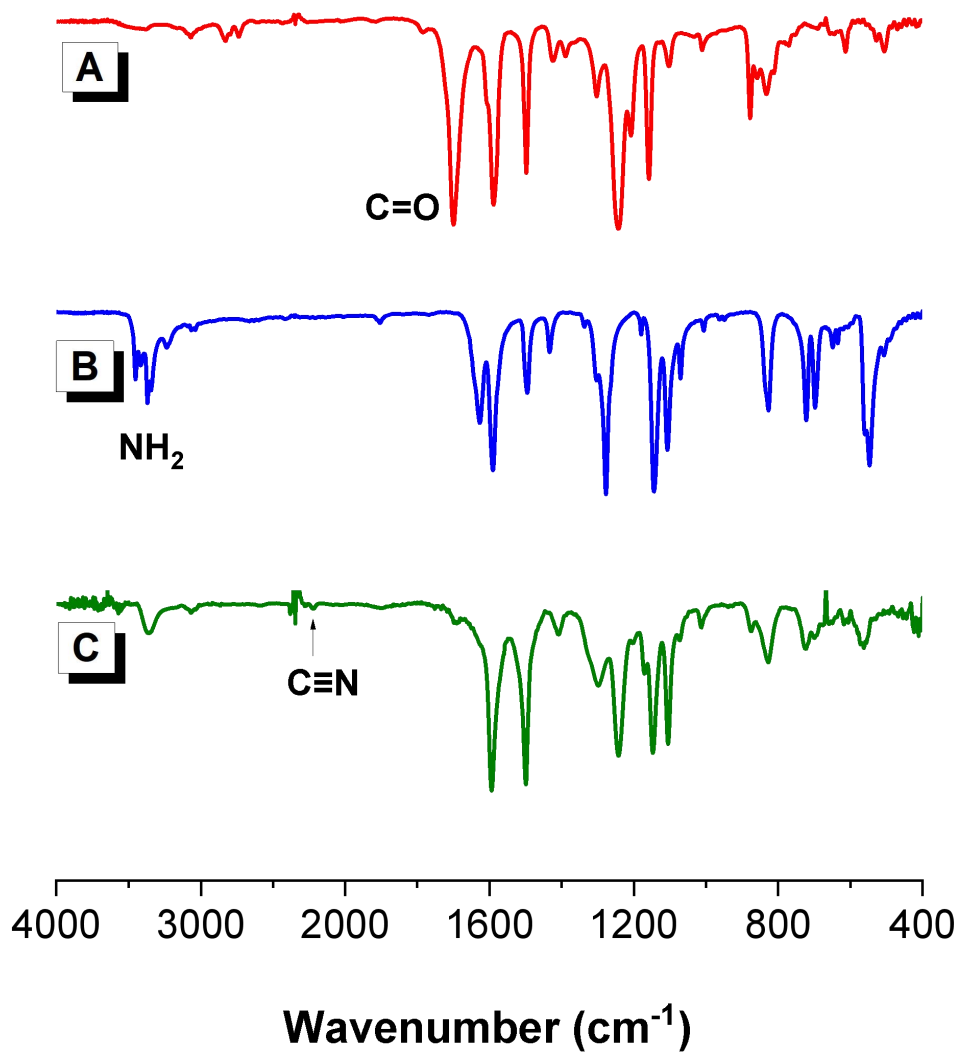

Figure S13. FT-IR spectra of (A) 1c, (B) 2d and (C) P1c/2d/3.

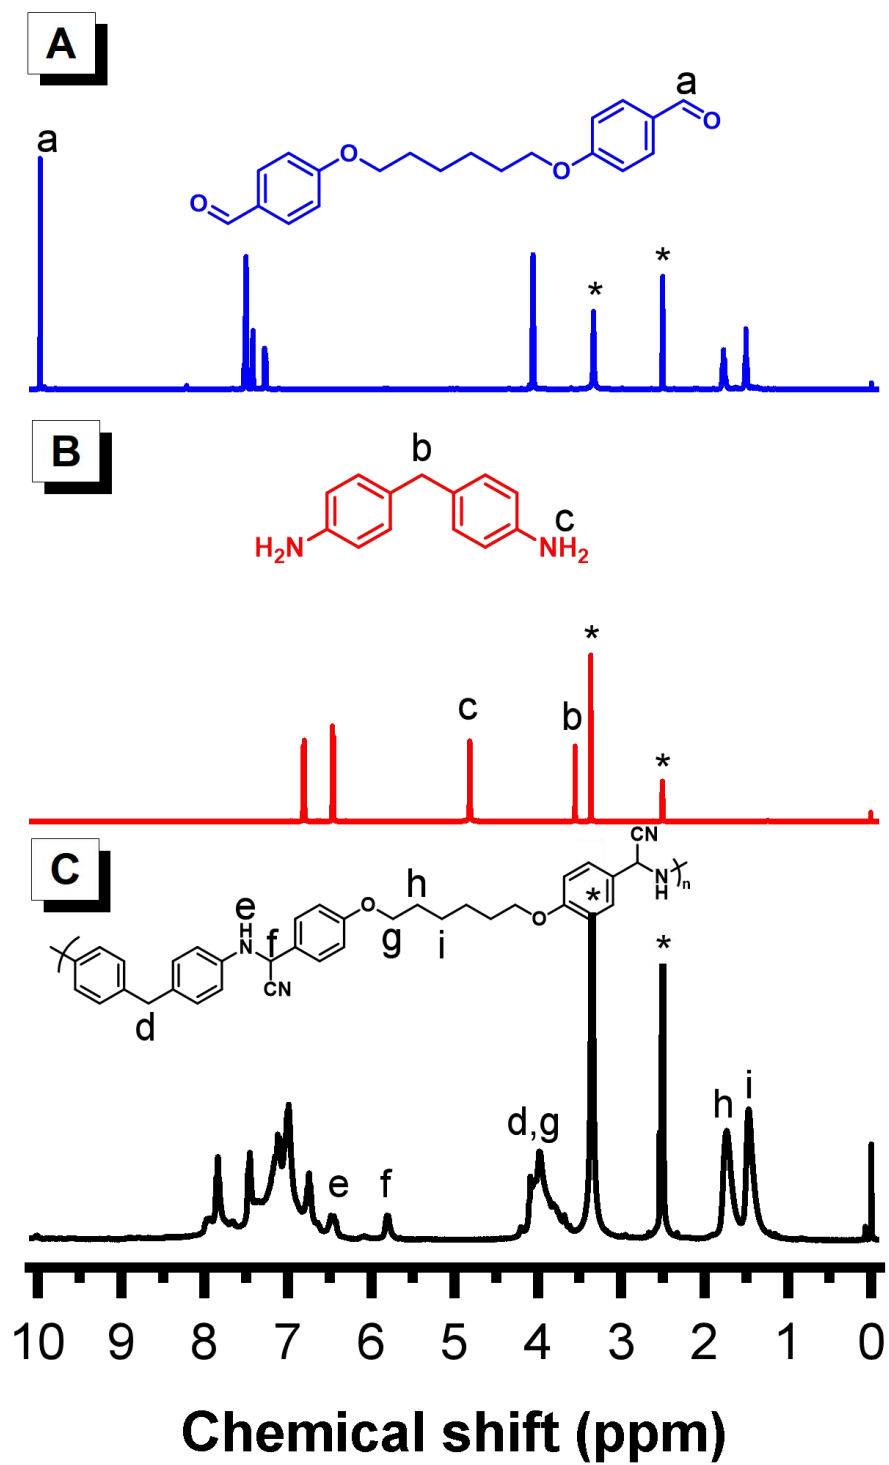

**Figure S14.**  $^1\text{H}$  NMR spectra of (A) **1a**, (B) **2b**, and (C) **P1a/2b/3** in  $\text{DMSO-}d_6$ . The solvent peaks are marked with asterisks.



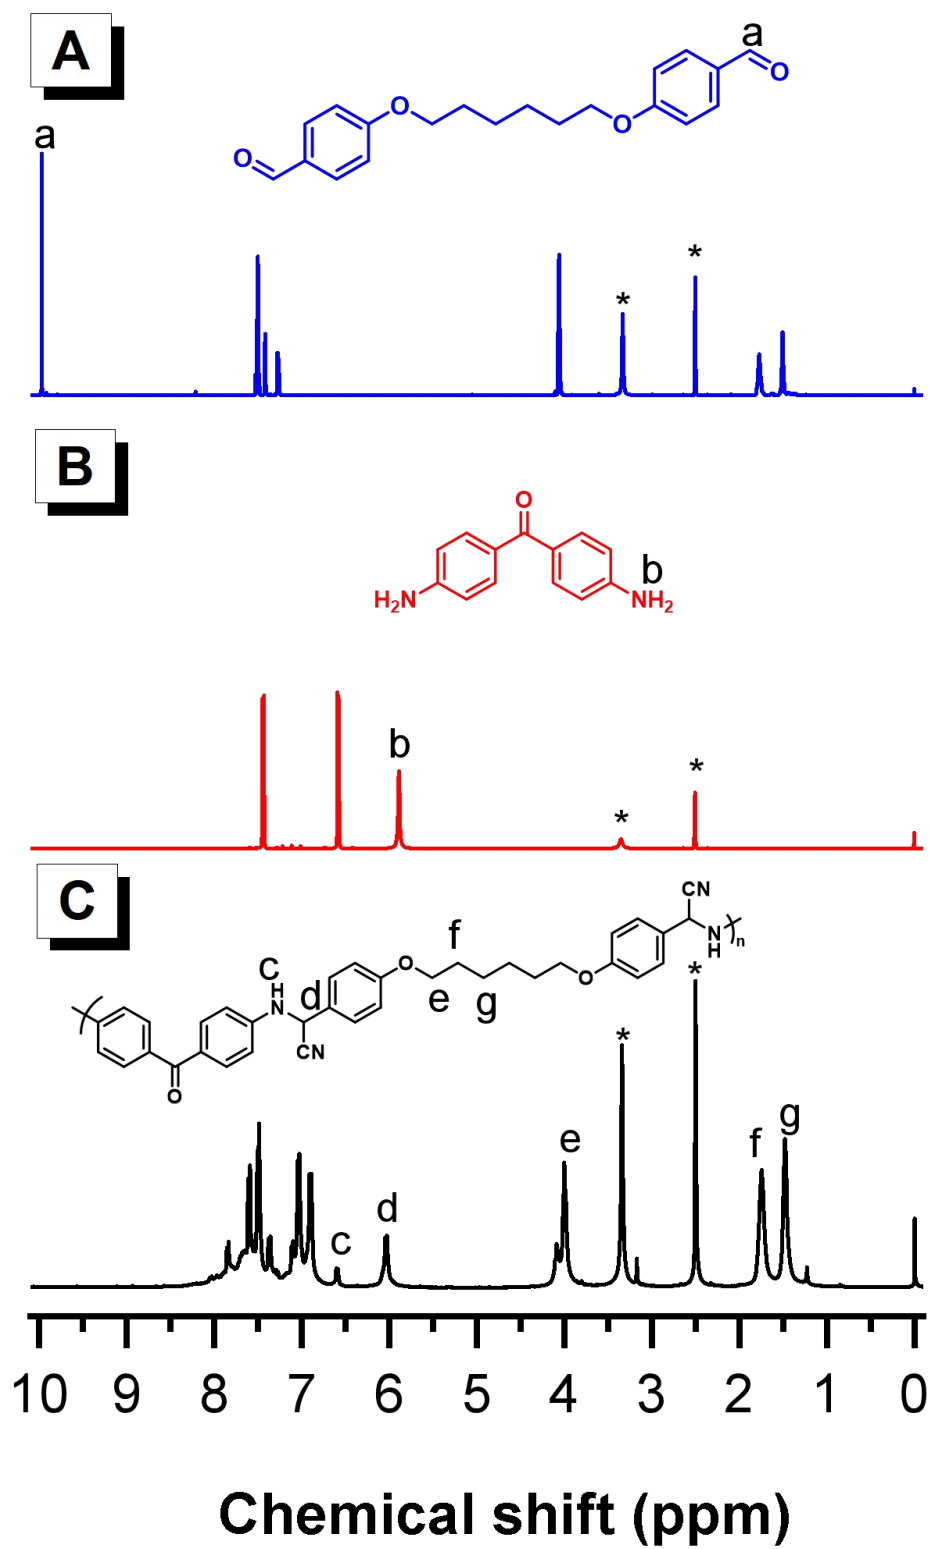

**Figure S15.**  $^1\text{H}$  NMR spectra of (A) **1a**, (B) **2c**, and (C) **P1a/2c/3** in  $\text{DMSO-}d_6$ . The solvent peaks are marked with asterisks.

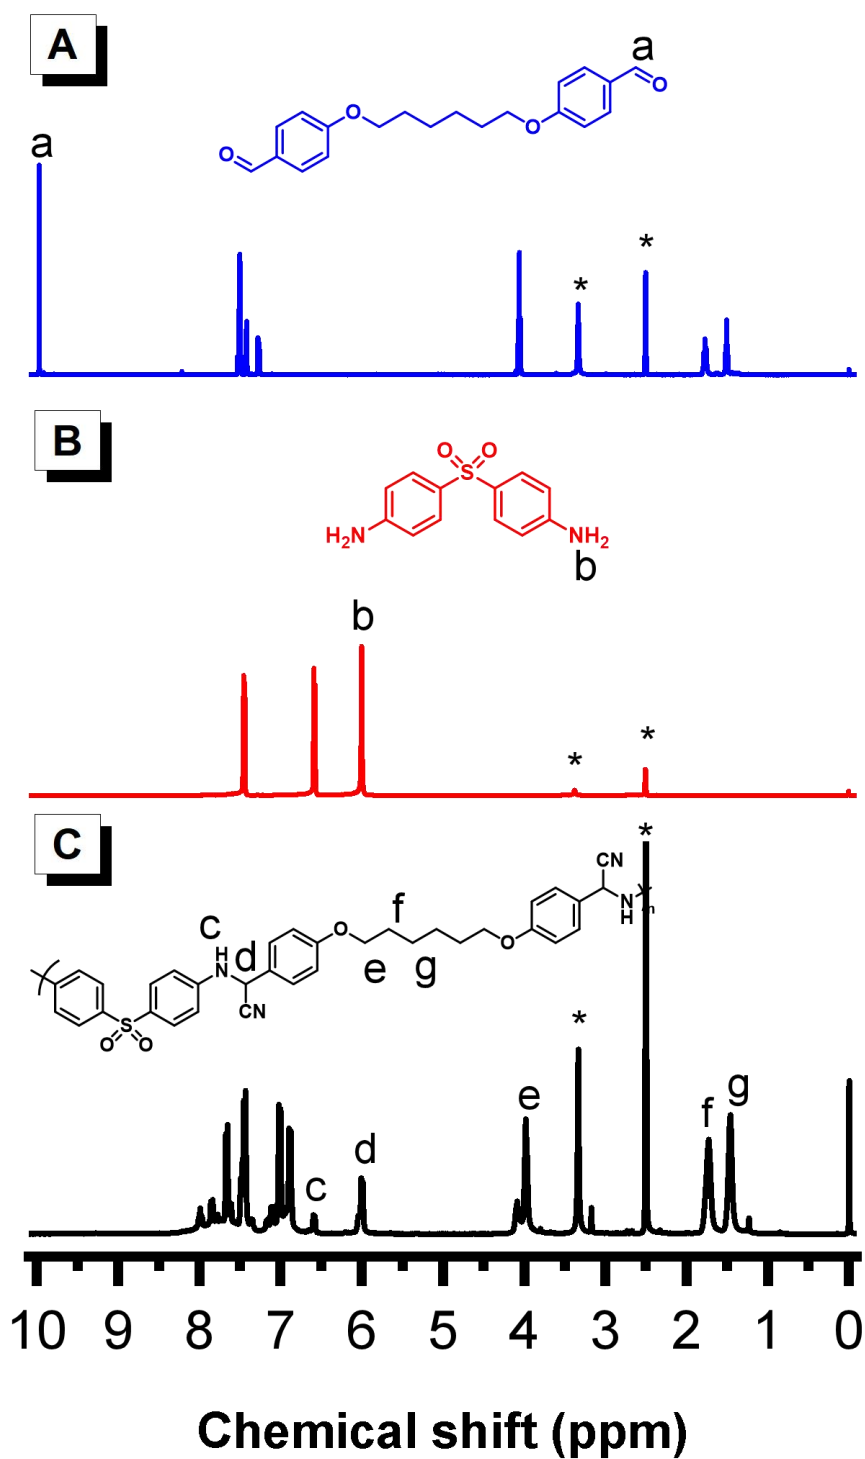

**Figure S16.**  $^1\text{H}$  NMR spectra of (A) **1a**, (B) **2d**, and (C) **P1a/2d/3** in  $\text{DMSO-}d_6$ . The solvent peaks are marked with asterisks.

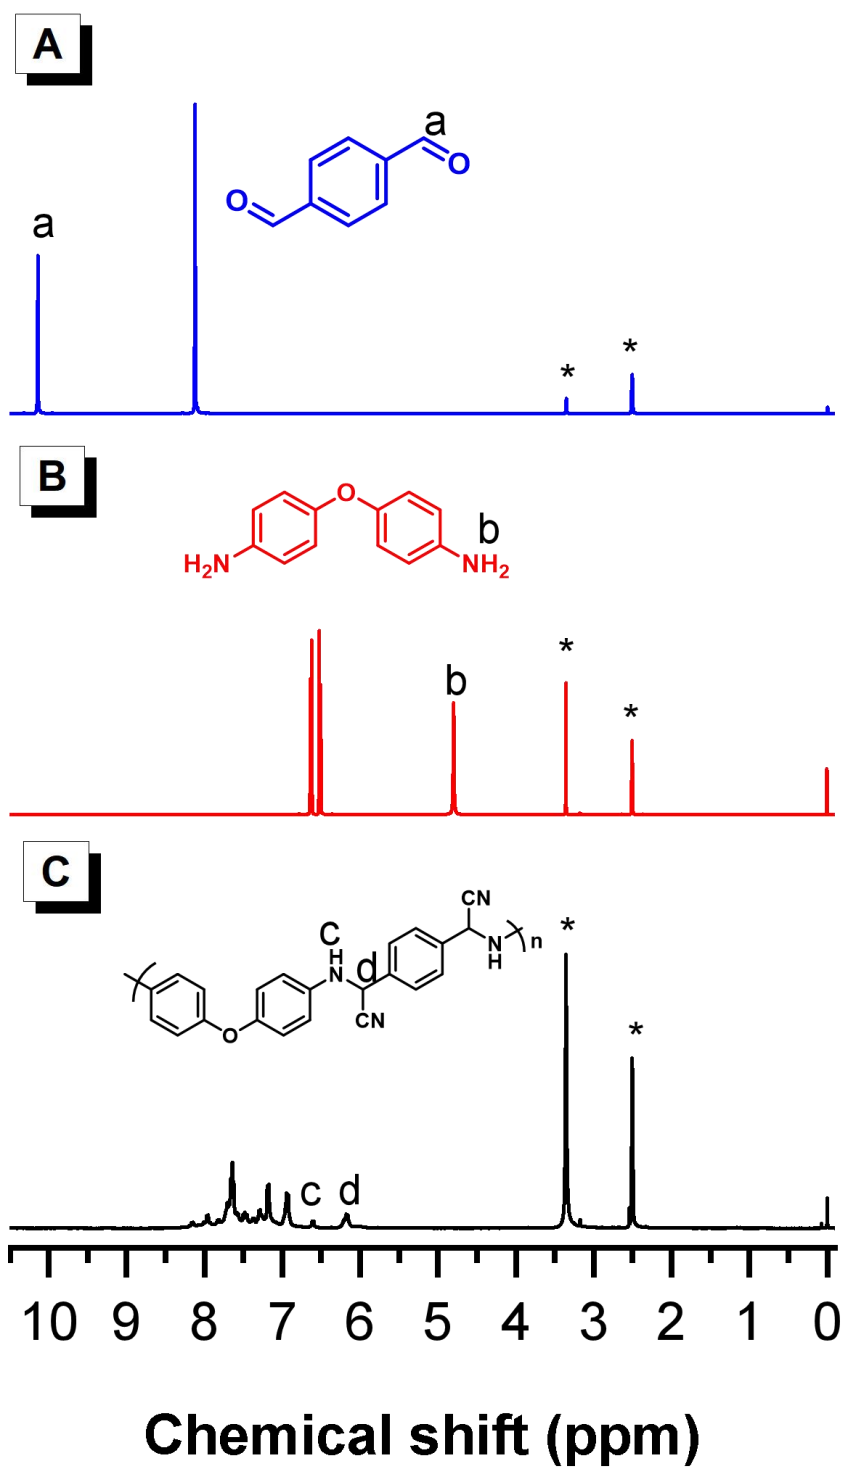

**Figure S17.**  $^1\text{H}$  NMR spectra of (A) **1b**, (B) **2a**, and (C) **P1b/2a/3** in  $\text{DMSO-}d_6$ . The solvent peaks are marked with asterisks.

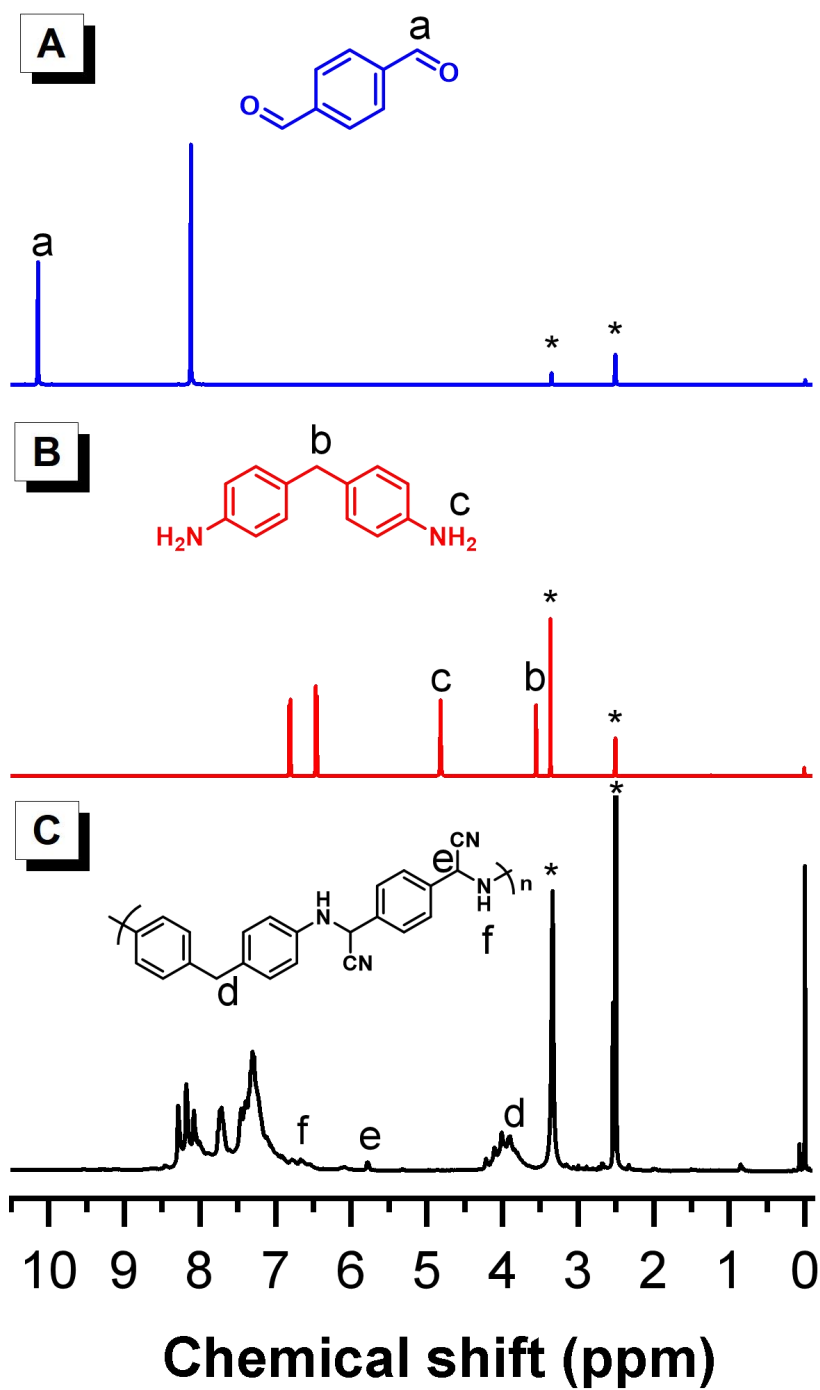

**Figure S18.**  $^1\text{H}$  NMR spectra of (A) **1b**, (B) **2b**, and (C) **P1b/2b/3** in  $\text{DMSO-}d_6$ . The solvent peaks are marked with asterisks.

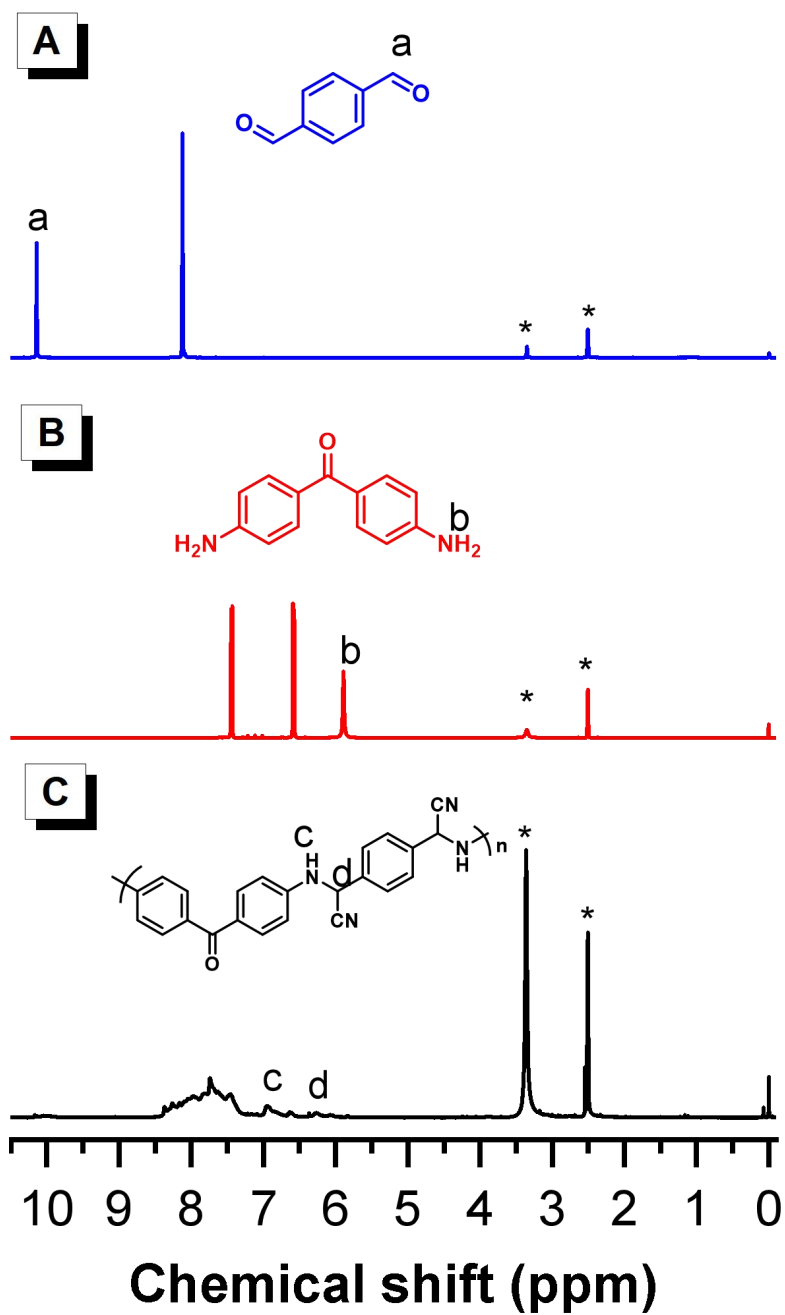

**Figure S19.**  $^1\text{H}$  NMR spectra of (A) **1b**, (B) **2c**, and (C) **P1b/2c/3** in  $\text{DMSO-}d_6$ . The solvent peaks are marked with asterisks.

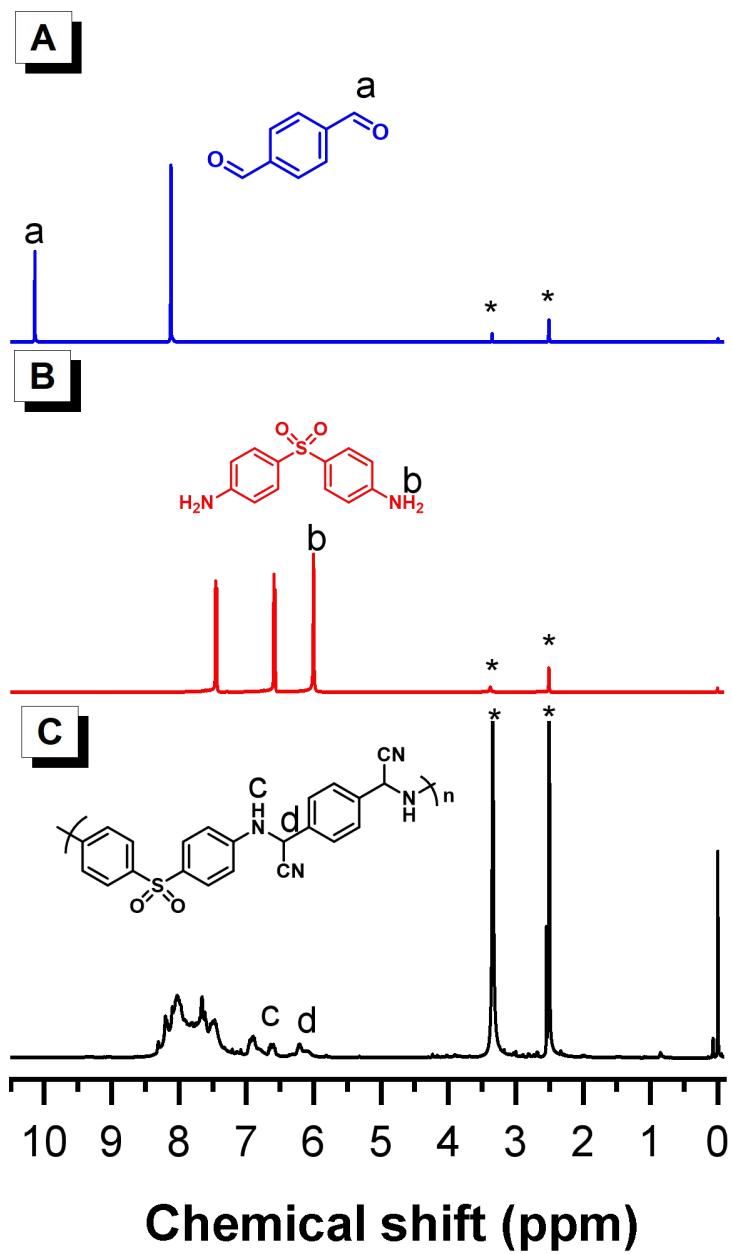

**Figure S20.**  $^1\text{H}$  NMR spectra of (A) **1b**, (B) **2d**, and (C) **P1b/2d/3** in  $\text{DMSO-}d_6$ . The solvent peaks are marked with asterisks.

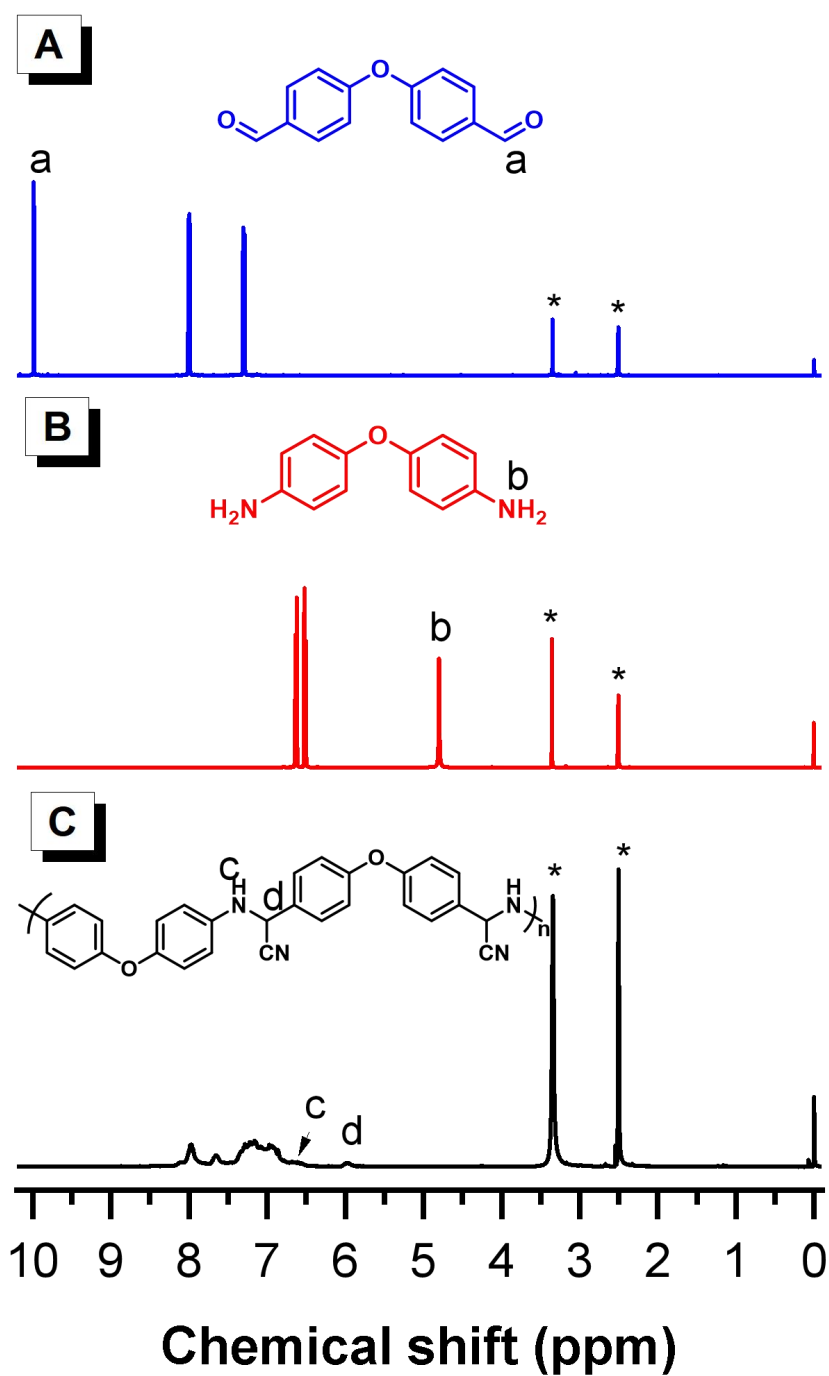

**Figure S21.**  $^1\text{H}$  NMR spectra of (A) **1c**, (B) **2a**, and (C) **P1c/2a/3** in  $\text{DMSO-}d_6$ . The solvent peaks are marked with asterisks.

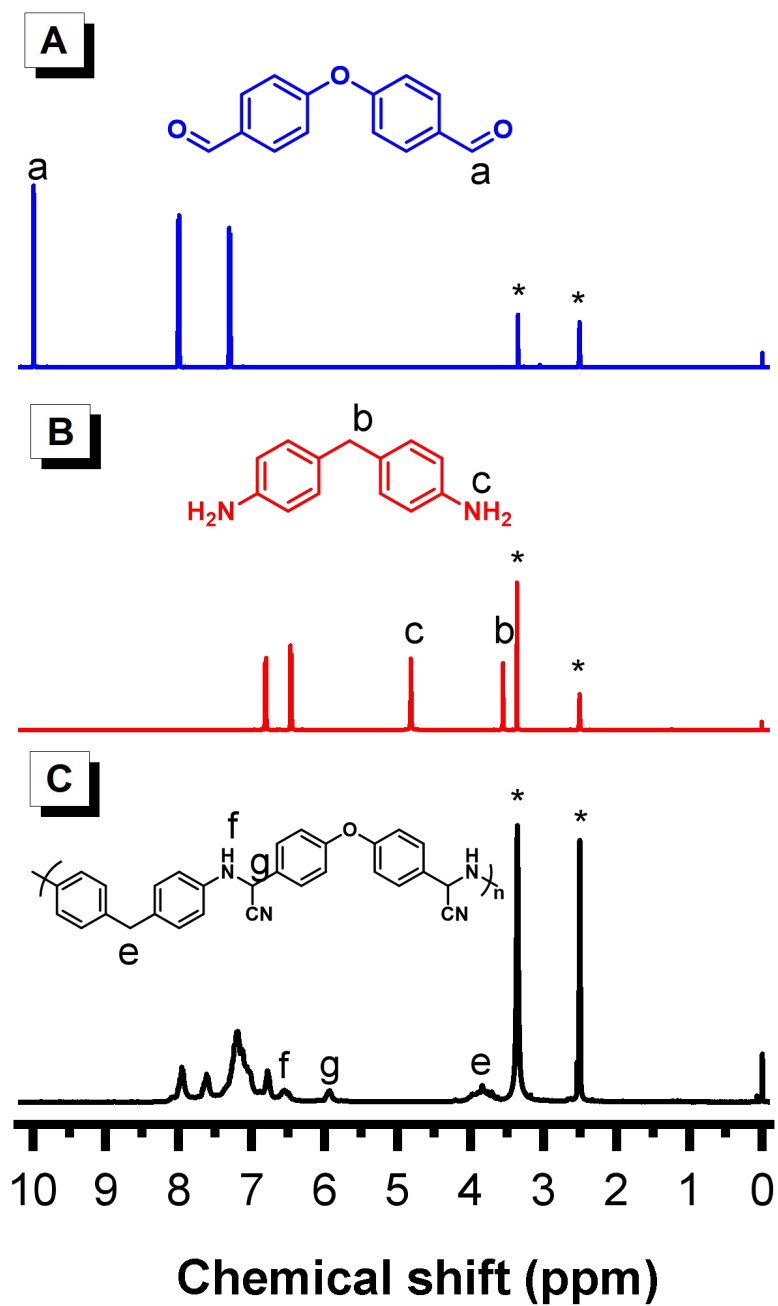

**Figure S22.**  $^1\text{H}$  NMR spectra of (A) **1c**, (B) **2b**, and (C) **P1c/2b/3** in  $\text{DMSO-}d_6$ . The solvent peaks are marked with asterisks.



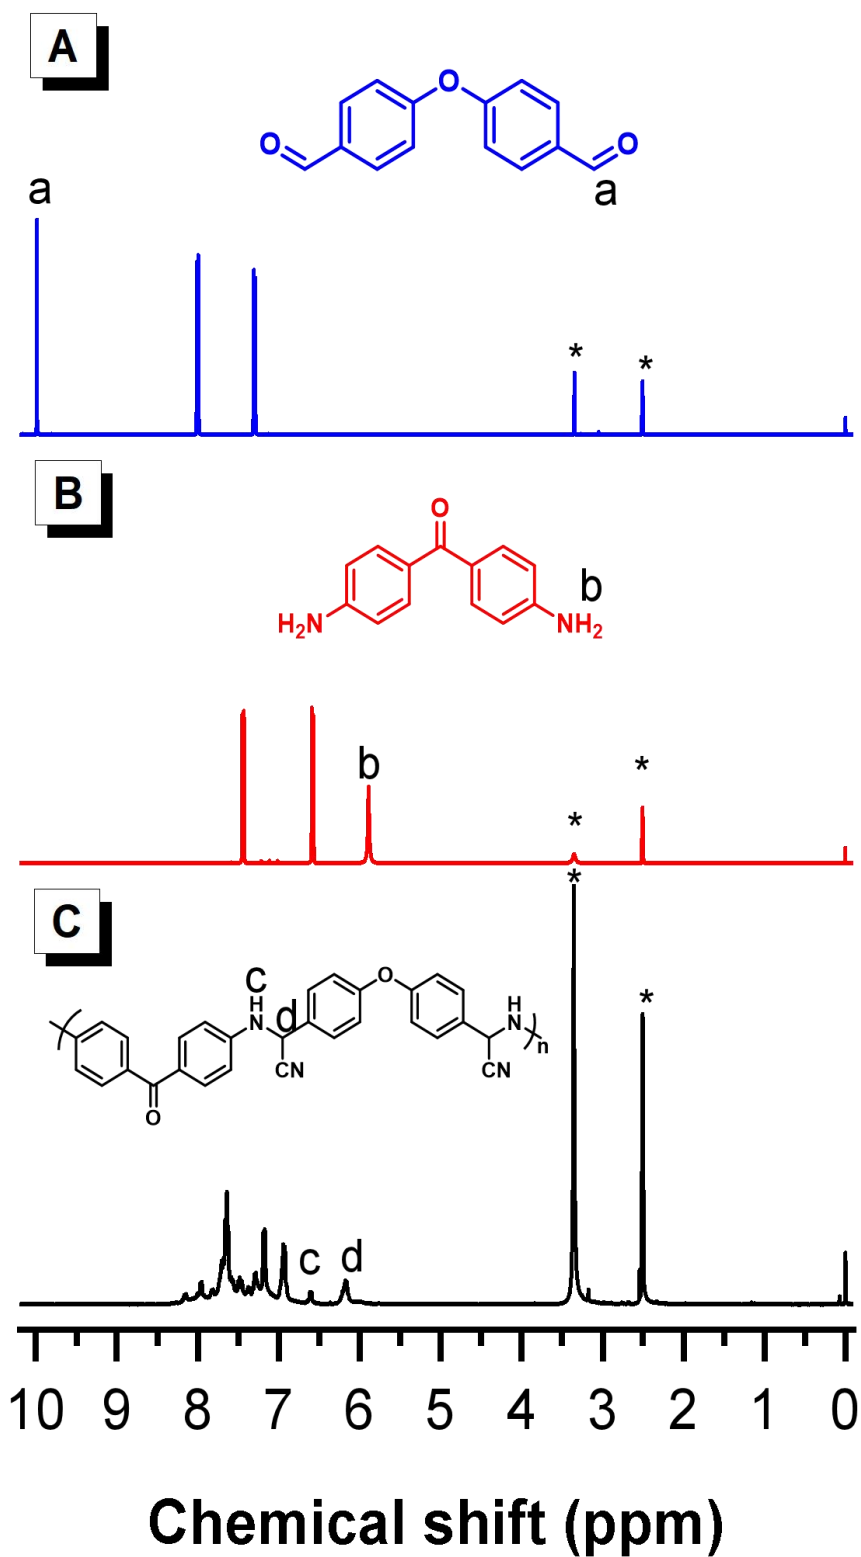

**Figure S23.**  $^1\text{H}$  NMR spectra of (A) **1c**, (B) **2c**, and (C) **P1c/2c/3** in  $\text{DMSO-}d_6$ . The solvent peaks are marked with asterisks.

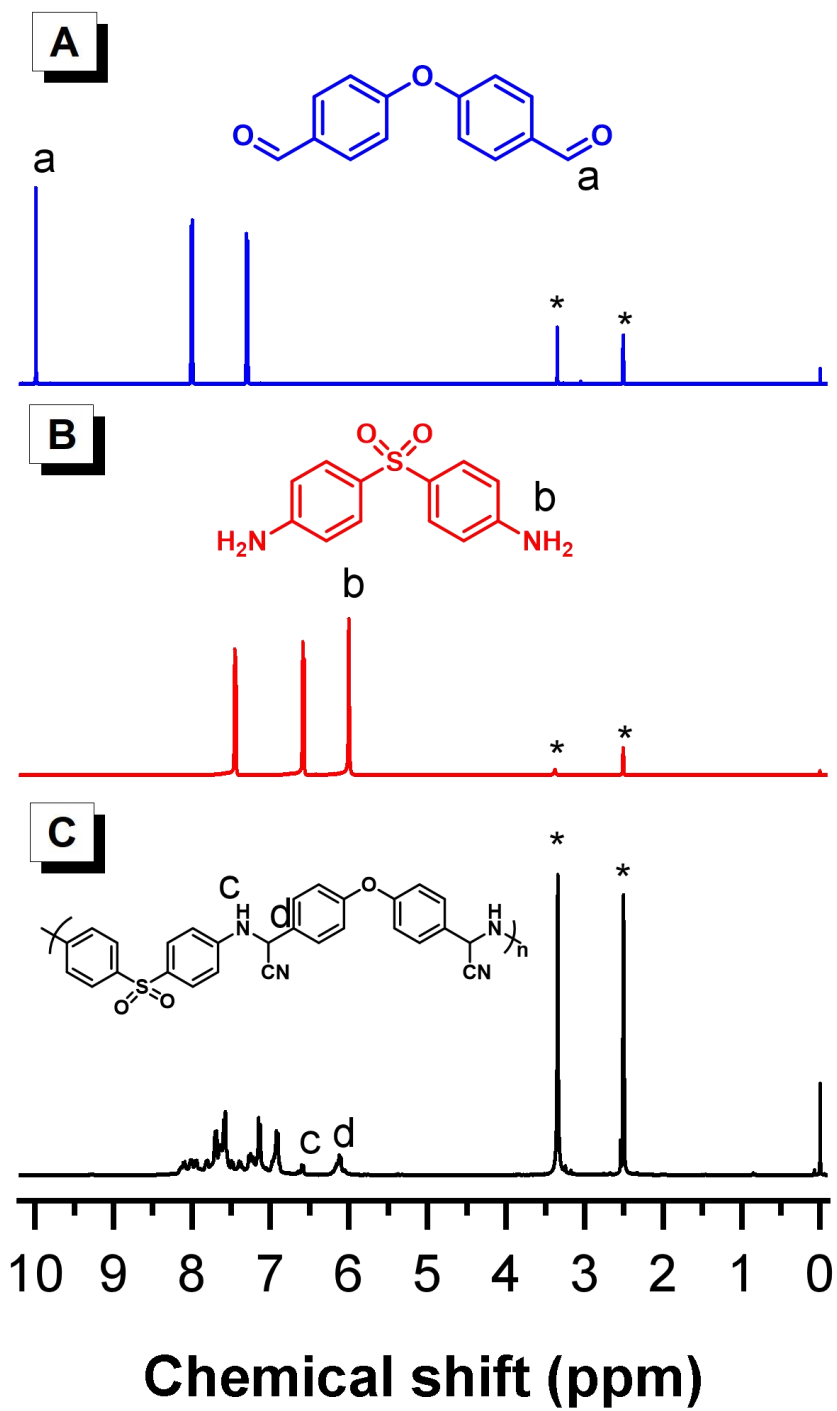

**Figure S24.**  $^1\text{H}$  NMR spectra of (A) **1c**, (B) **2d**, and (C) **P1c/2d/3** in  $\text{DMSO-}d_6$ . The solvent peaks are marked with asterisks.

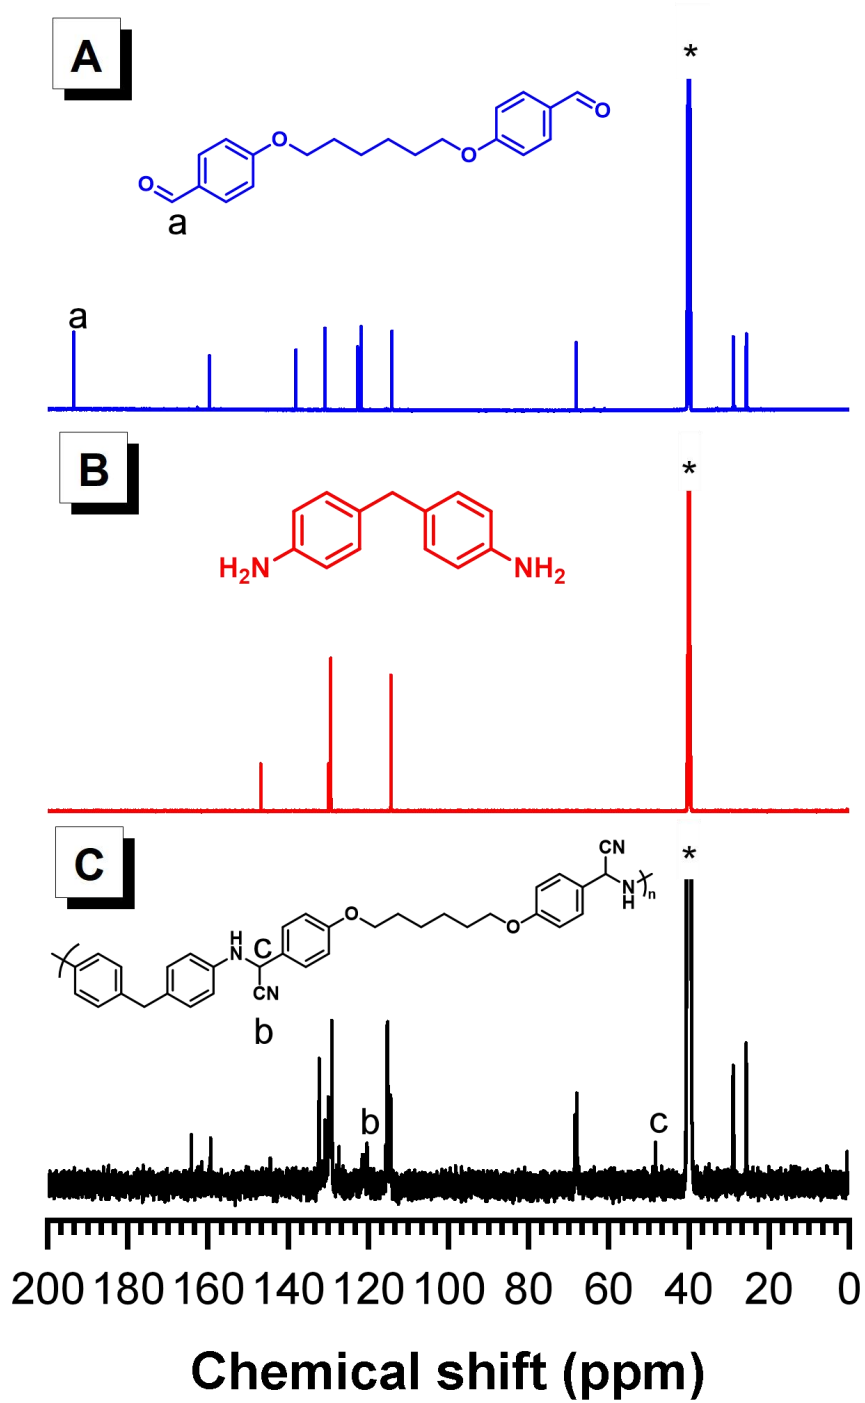

**Figure S25.**  $^{13}\text{C}$  NMR spectra of (A) **1a**, (B) **2b**, and (C) **P1a/2b/3** in  $\text{DMSO-}d_6$ . The solvent peaks are marked with asterisks.

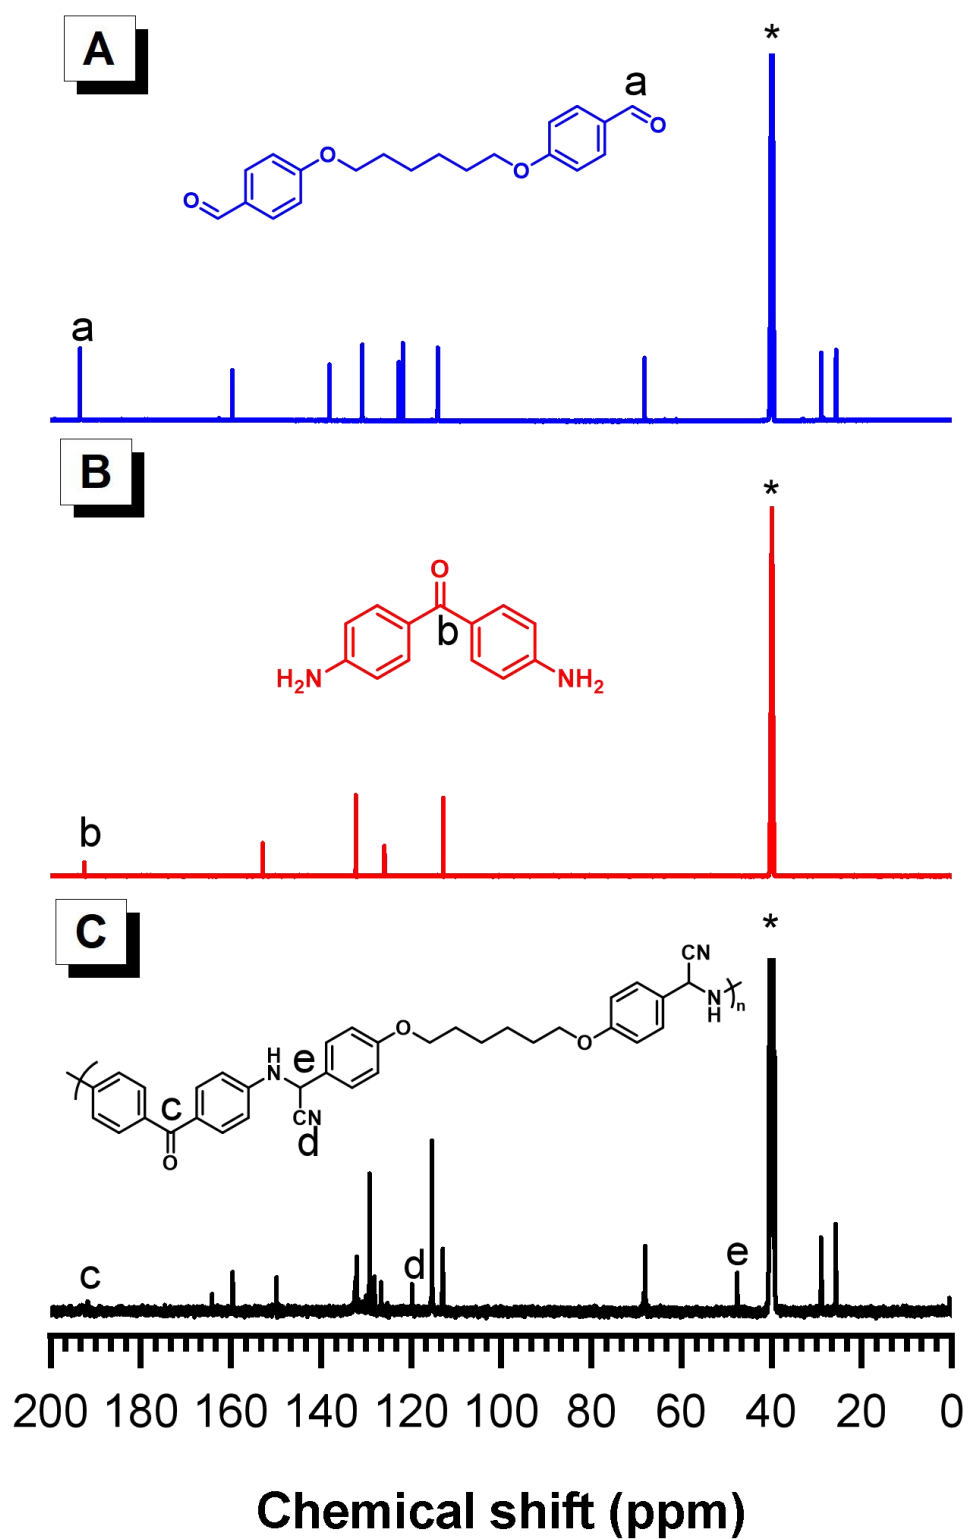

**Figure S26.**  $^{13}\text{C}$  NMR spectra of (A) **1a**, (B) **2c**, and (C) **P1a/2c/3** in  $\text{DMSO-}d_6$ . The solvent peaks are marked with asterisks.

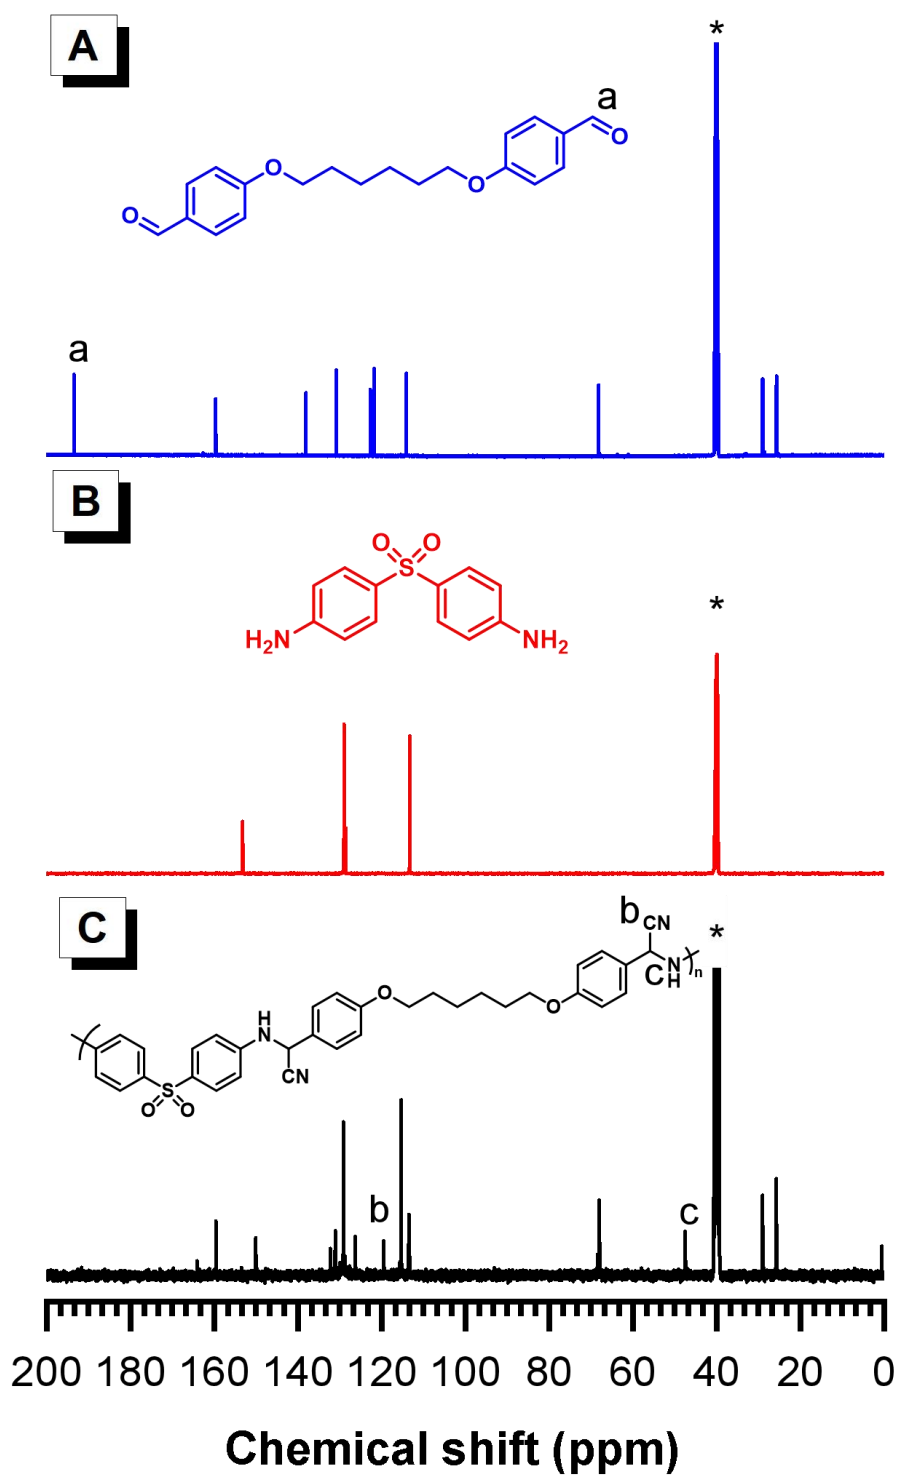

**Figure S27.**  $^{13}\text{C}$  NMR spectra of (A) **1a**, (B) **2d**, and (C) **P1a/2d/3** in  $\text{DMSO-}d_6$ . The solvent peaks are marked with asterisks.

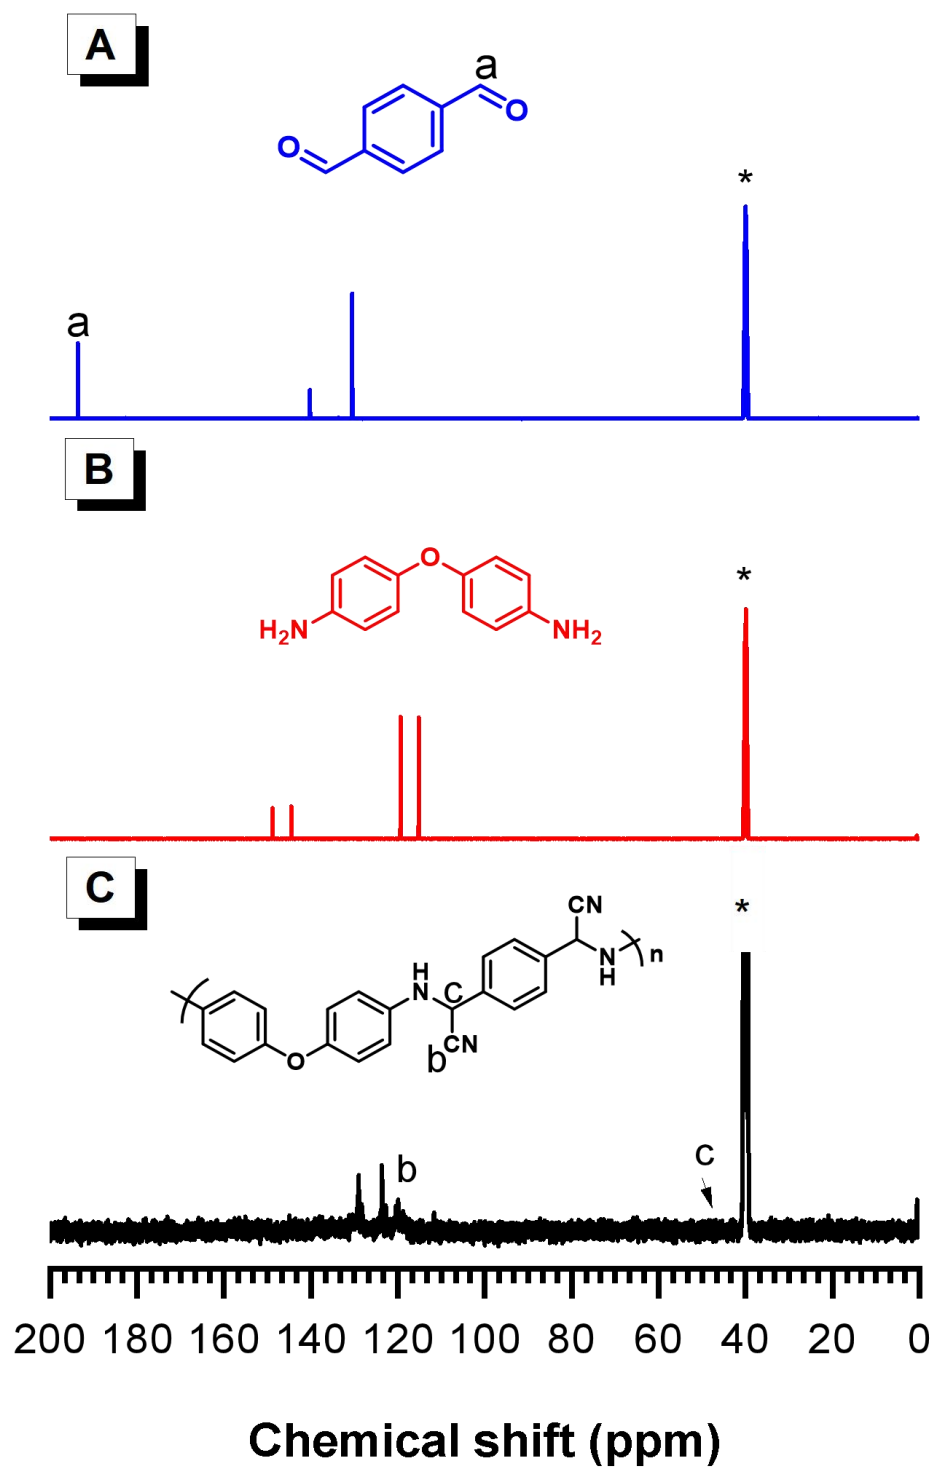

**Figure S28.**  $^{13}\text{C}$  NMR spectra of (A) **1b**, (B) **2a**, and (C) **P1b/2a/3** in  $\text{DMSO-}d_6$ . The solvent peaks are marked with asterisks.

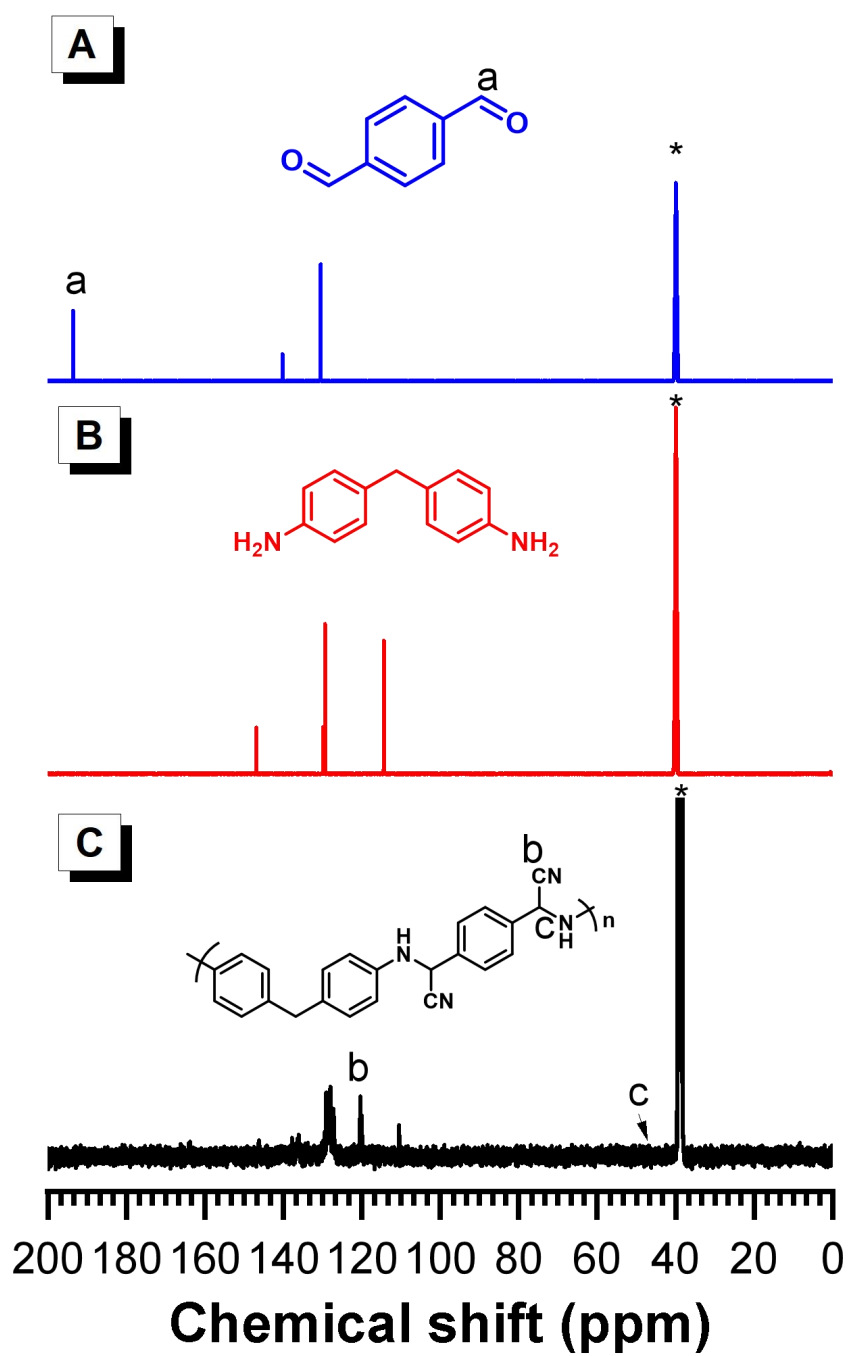

**Figure S29.**  $^{13}\text{C}$  NMR spectra of (A) **1b**, (B) **2b**, and (C) **P1b/2b/3** in  $\text{DMSO-}d_6$ . The solvent peaks are marked with asterisks.

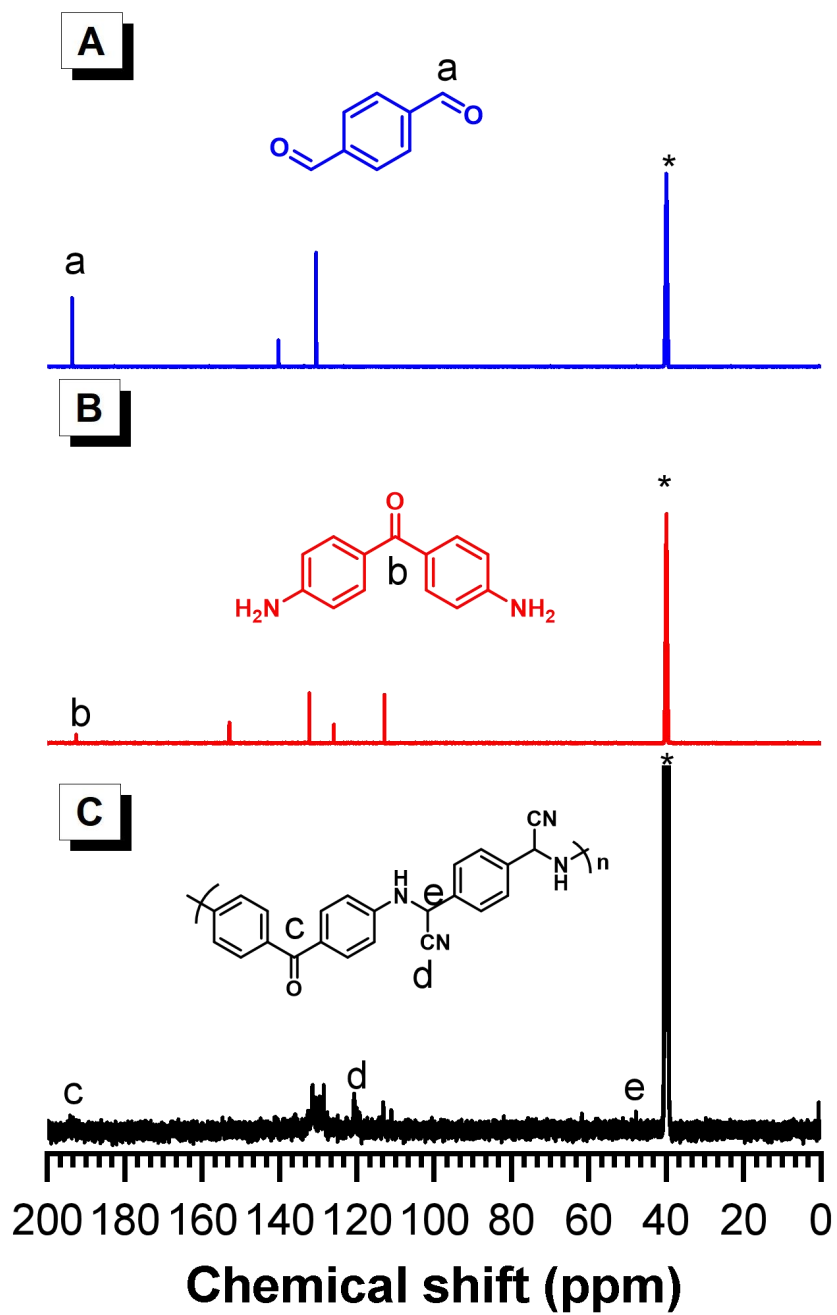

**Figure S30.**  $^{13}\text{C}$  NMR spectra of (A) **1b**, (B) **2c**, and (C) **P1b/2c/3** in  $\text{DMSO-}d_6$ . The solvent peaks are marked with asterisks.



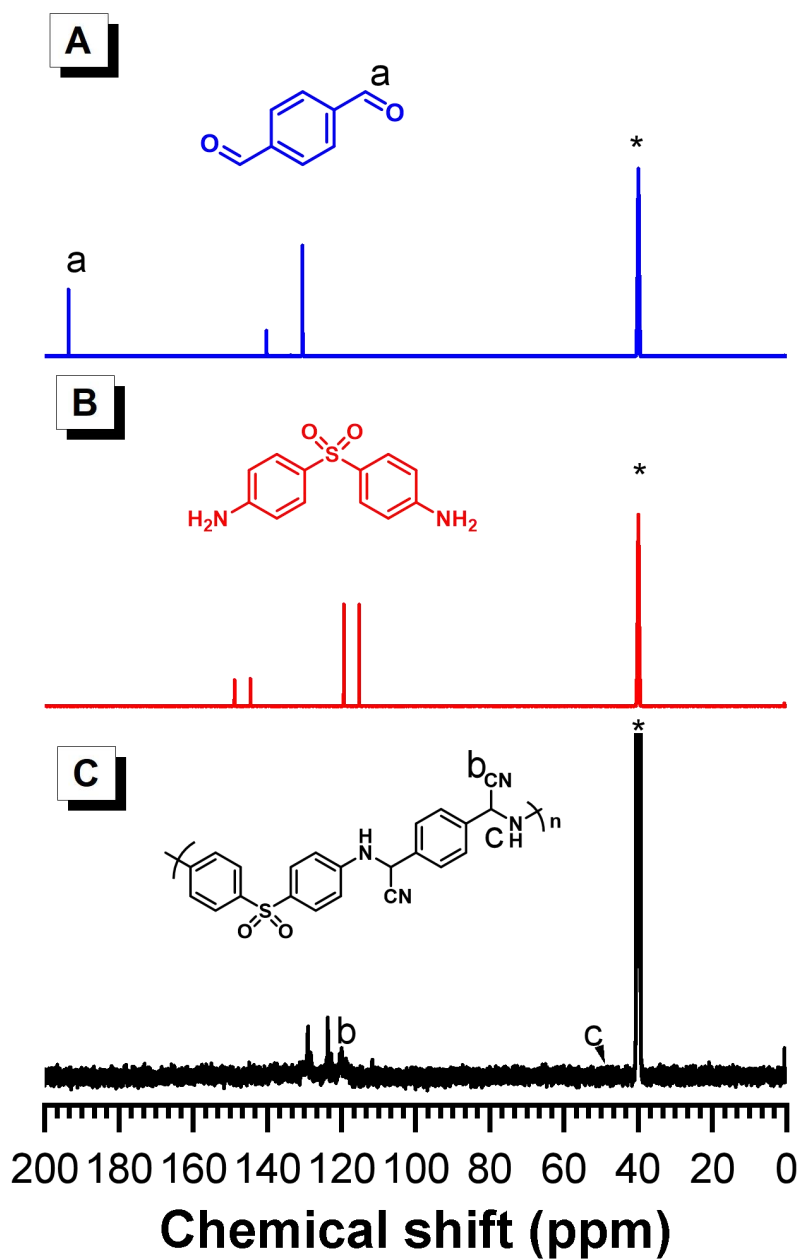

**Figure S31.**  $^{13}\text{C}$  NMR spectra of (A) **1b**, (B) **2d**, and (C) **P1b/2d/3** in  $\text{DMSO-}d_6$ . The solvent peaks are marked with asterisks.

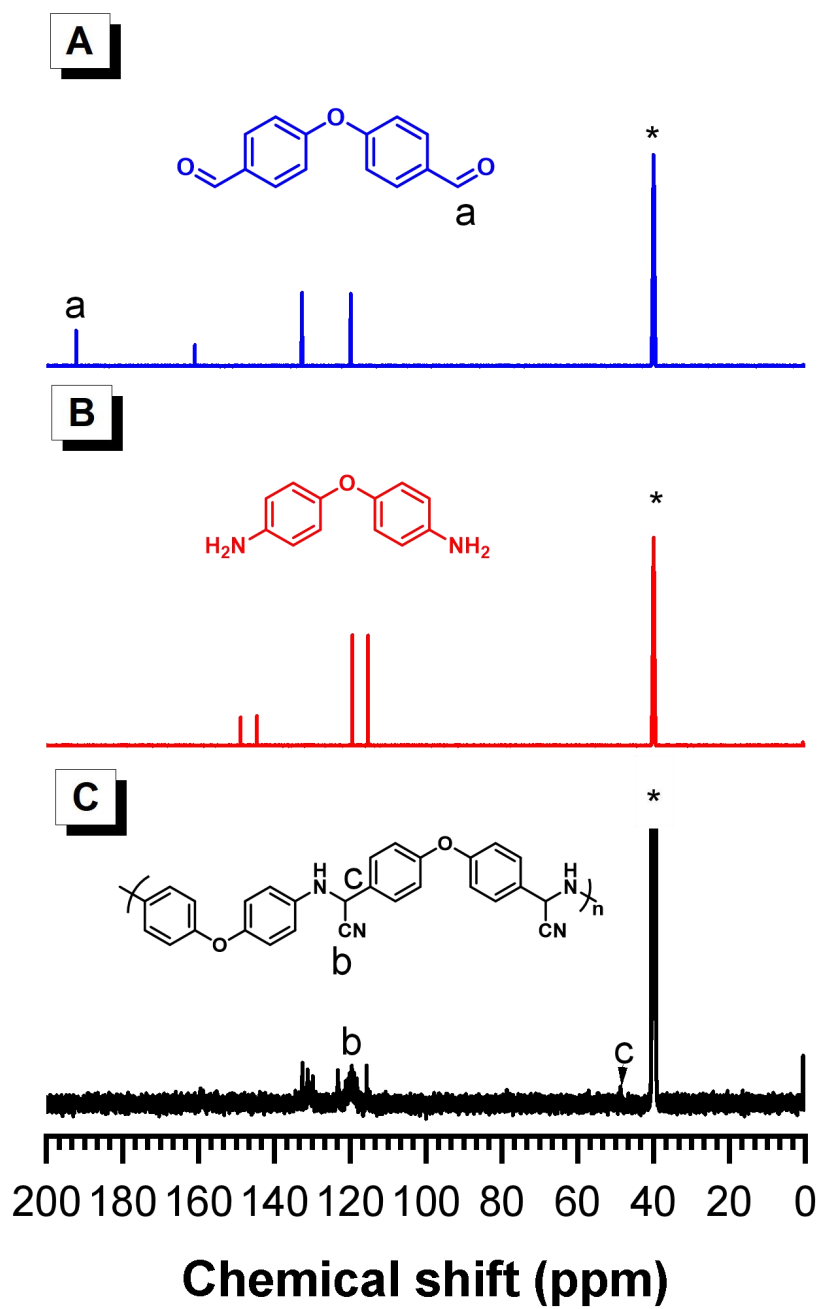

**Figure S32.**  $^{13}\text{C}$  NMR spectra of (A) **1c**, (B) **2a**, and (C) **P1c/2a/3** in  $\text{DMSO-}d_6$ . The solvent peaks are marked with asterisks.

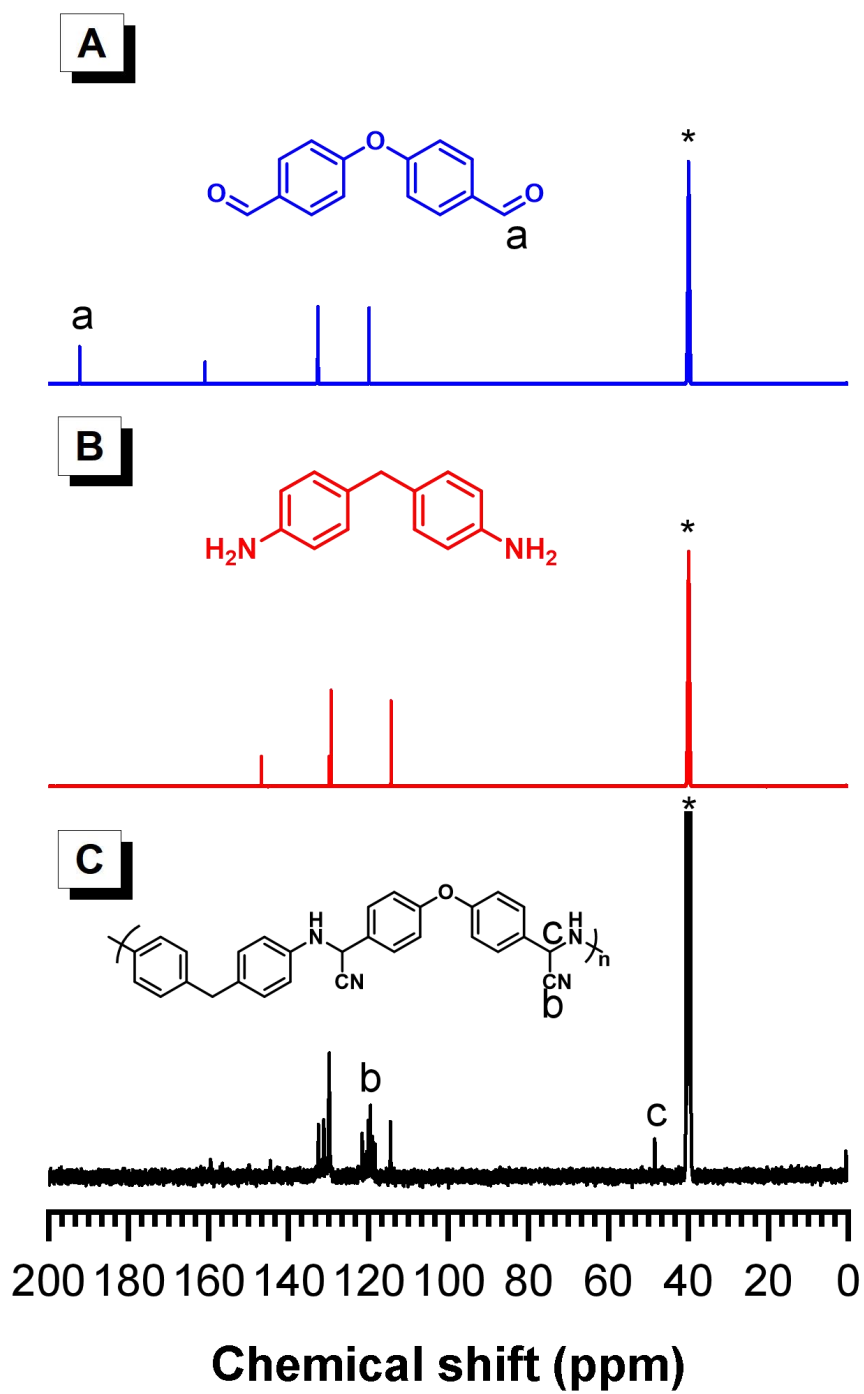

**Figure S33.**  $^{13}\text{C}$  NMR spectra of (A) **1c**, (B) **2b**, and (C) **P1c/2b/3** in  $\text{DMSO-}d_6$ . The solvent peaks are marked with asterisks.

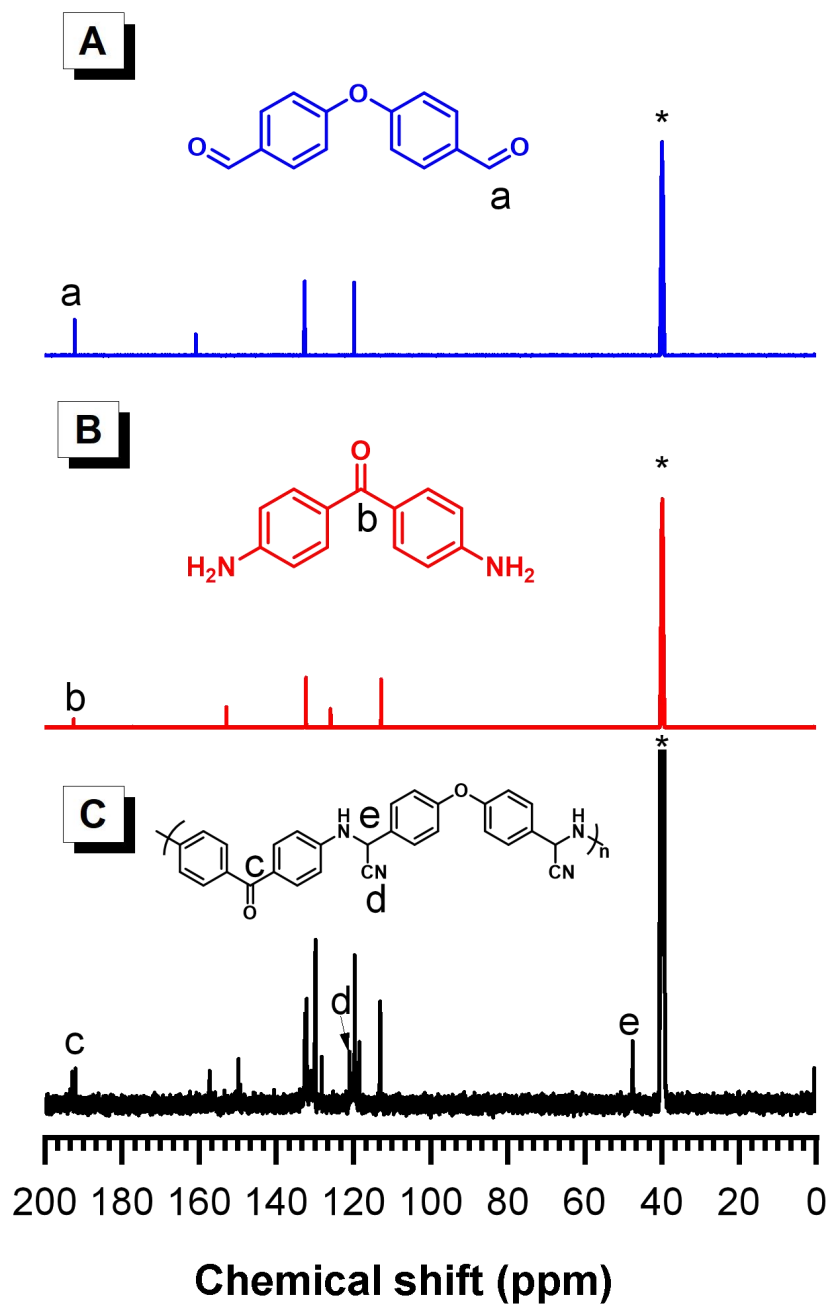

**Figure S34.**  $^{13}\text{C}$  NMR spectra of (A) **1c**, (B) **2c**, and (C) **P1c/2c/3** in  $\text{DMSO-}d_6$ . The solvent peaks are marked with asterisks.

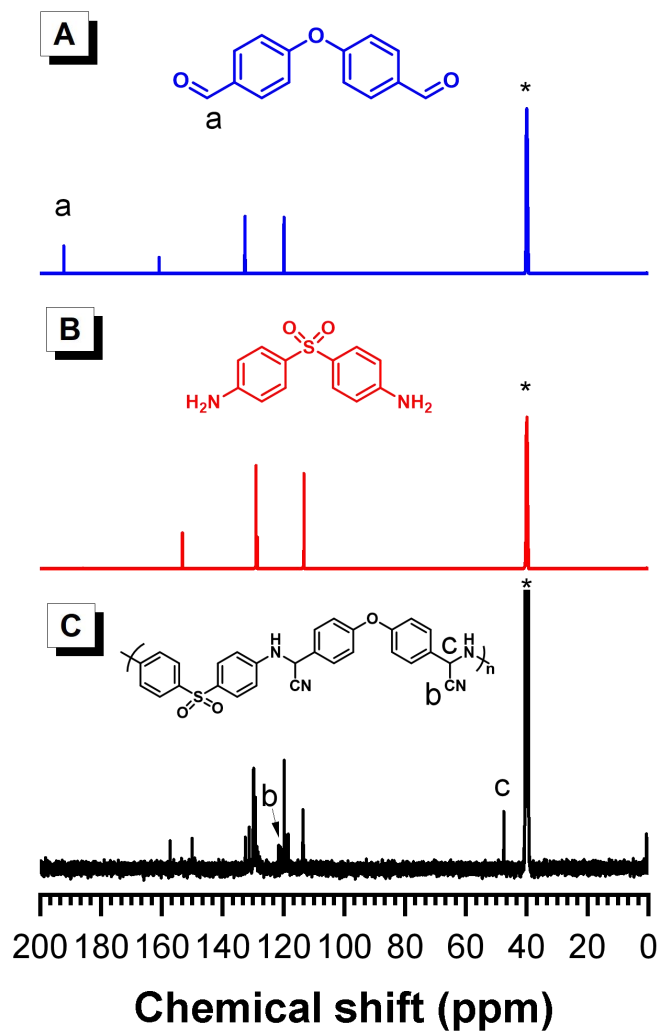

Figure S35.  $^{13}\text{C}$  NMR spectra of (A) **1c**, (B) **2d**, and (C) **P1c/2d/3** in  $\text{DMSO-}d_6$ . The solvent peaks are marked with asterisks.

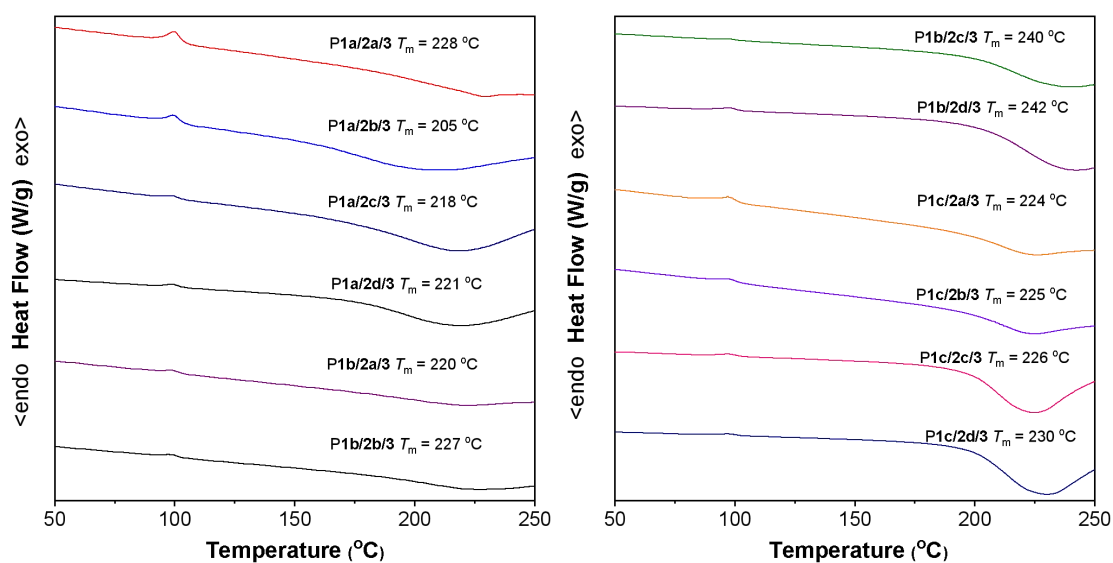

Figure S36. DSC curve of polymers.

**Table S1.** Refractive Indices, Abbé Numbers ( $\nu_D$ ), Revised Abbé Numbers ( $\nu'$ ), and Optical Dispersions ( $D$  and  $D'$ ) of Thin Films of **P1a/2/3**.<sup>a</sup>

| Polymer         | $n_{589}^b$ | $n_{632.8}^c$ | $\nu_D^d$ | $D^d$  | $\nu'^e$ | $D'^e$ |
|-----------------|-------------|---------------|-----------|--------|----------|--------|
| <b>P1a/2a/3</b> | 1.7447      | 1.7322        | 11.2      | 0.0890 | 39.5     | 0.0253 |
| <b>P1a/2b/3</b> | 1.7006      | 1.6941        | 20.4      | 0.0491 | 75.7     | 0.0132 |
| <b>P1a/2c/3</b> | 1.7166      | 1.7049        | 11.5      | 0.0867 | 40.8     | 0.0245 |
| <b>P1a/2d/3</b> | 1.6793      | 1.6701        | 14.0      | 0.0714 | 50.4     | 0.0199 |

<sup>a</sup>Data taken from Figure 6B. <sup>b</sup> $n$  = RI value at 589 nm; <sup>c</sup> $n$  = RI value at 632.8 nm; <sup>d</sup> $\nu_D = (n_D - 1)/(n_F - n_C)$ , where  $n_D$ ,  $n_F$  and  $n_C$  are the RI values at wavelengths of Fraunhofer D, F and C spectral lines of 589.2, 486.1 and 656.3 nm, respectively;  $D = 1/\nu_D$ . <sup>e</sup> $\nu' = \text{Abbé numbers} = (n_{1319} - 1)/(n_{1064} - n_{1550})$ , where  $n_{1319}$ ,  $n_{1064}$  and  $n_{1550}$  are the RI values at wavelengths of 1319, 1064 and 1553 nm, respectively;  $D' = 1/\nu'$ .

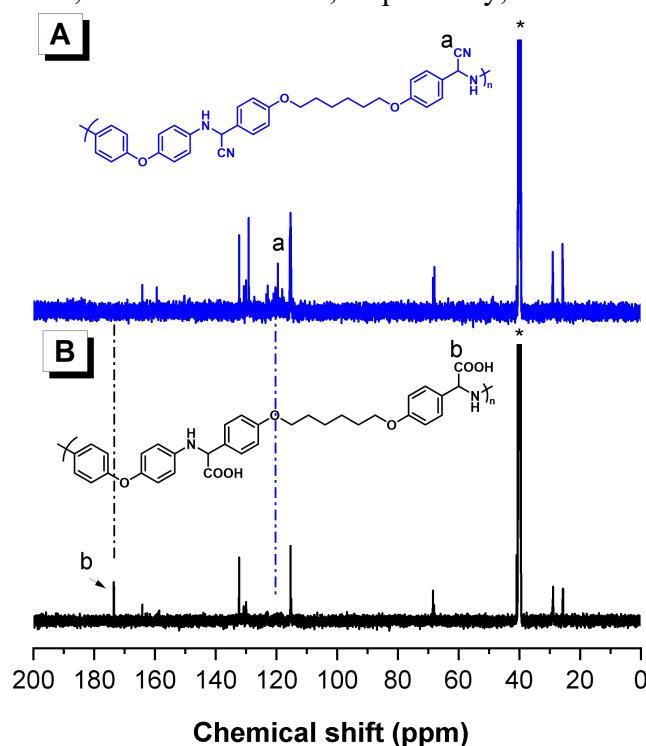

**Figure S37.** <sup>13</sup>C NMR spectra of (A) **P1a/2a/3** and (B) postfunctionalized **P1a/2a/3** in DMSO-*d*<sub>6</sub>. The solvent and water peaks are marked with asterisks.

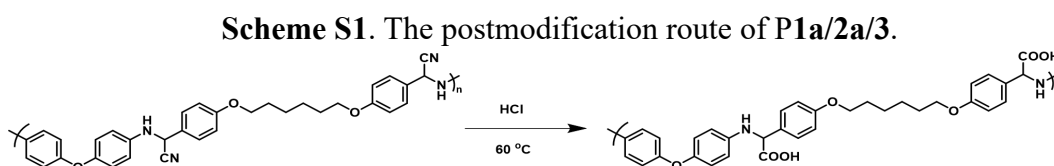

Supplement: d4py00255e1.pdf [file d4py00255e1.pdf]
